1

2 **Title:** A robust metaproteomics pipeline for a holistic taxonomic and functional  
3 characterization of microbial communities from marine particles

4 **Authors:** Doreen Schultz,<sup>1</sup> Daniela Zühlke,<sup>1</sup> Jörg Bernhardt,<sup>1</sup> Thomas Ben Francis,<sup>2</sup> Dirk  
5 Albrecht,<sup>1</sup> Claudia Hirschfeld,<sup>1</sup> Stephanie Markert,<sup>3</sup> and Katharina Riedel <sup>1\*</sup>

6

7 **Addresses:** <sup>1</sup> Institute of Microbiology, University of Greifswald, Greifswald, Germany.

8 <sup>2</sup> Max-Planck Institute for Marine Microbiology, Bremen, Germany.

9 <sup>3</sup> Institute of Pharmacy, University of Greifswald, Greifswald, Germany.

10

11 **\*Corresponding author mailing address:** Institute of Microbiology, Center for Functional  
12 Genomics of Microbes (C\_FunGene), University of Greifswald, Felix-Hausdorff-Straße 8, DE-  
13 17487 Greifswald, Germany. E-mail [riedela@uni-greifswald.de](mailto:riedela@uni-greifswald.de); Tel (+49) 3834 420 5900

14

15 **Running title:** Metaproteomic pipeline to analyse marine particles

## 16 **Originality-Significance Statement**

17 Marine particles consist of organic particulate matter (e.g. phyto- or zooplankton) and  
18 particle-associated (PA) microbial communities, which are often embedded in a sugary  
19 matrix. A significant fraction of the decaying algal biomass in marine ecosystems is expected  
20 to be mineralized by PA heterotrophic communities, which are thus greatly contributing to  
21 large-scale carbon fluxes. Whilst numerous studies have investigated the succession of  
22 planktonic marine bacteria along phytoplankton blooms, the community structure and  
23 functionality of PA bacterial communities remained largely unexplored and knowledge on  
24 specific contributions of these microorganisms to carbon cycling is still surprisingly limited.  
25 This has been mostly due to technical problems, i.e. to the difficulty to retrieve genomic  
26 DNA and proteins from these polysaccharide-rich entities, their enormous complexity and the  
27 high abundance of eukaryotic microorganisms.

28 Our study presents an innovative, robust, reproducible, and reliable metaproteomics  
29 pipeline for marine particles, which will help to address and fill the above-described  
30 knowledge gap. Employing the here established workflow enabled us to identify more than  
31 5,000 PA proteins, which is, at least to our knowledge, the largest number of protein groups  
32 ever assigned to marine particles. Notably, the novel pipeline has been validated by a first,  
33 comparative metaproteome analysis of free-living and PA bacterial communities indicating a  
34 significant functional shift enabling surface-associated bacteria to adapt to particle-specific  
35 living conditions. In conclusion, our novel metaproteomics pipeline presents a solid and  
36 promising methodological groundwork for future culture-independent analyses of seasonal  
37 taxonomic and functional successions of PA microbial communities in aquatic habitats.

## 38 **Summary**

39 This study aimed to establish a robust, reproducible and reliable metaproteomic pipeline for  
40 an in-depth characterization of marine particle-associated (PA) bacteria. To this end, we  
41 compared six well-established protein extraction protocols together with different MS-sample  
42 preparation techniques using particles sampled during a North Sea spring algae bloom in  
43 2009. In this optimized workflow, proteins are extracted using a combination of SDS-  
44 containing lysis buffer and cell disruption by bead-beating, separated by SDS-PAGE, in-gel  
45 digested and analysed by LC-MS/MS, before MASCOT search against a metagenome-  
46 based database and data processing/visualization with the *in-house*-developed  
47 bioinformatics tools *Prophane* and *Paver*.

48 As proof of principle, free-living (FL) and particulate communities sampled in April 2009  
49 were analysed, resulting in an as yet unprecedented number of 9,354 and 5,034 identified  
50 protein groups for FL and PA bacteria, respectively. Our data revealed that FL and PA  
51 communities appeared similar in their taxonomic distribution, with notable exceptions:  
52 eukaryotic proteins and proteins assigned to *Flavobacteriia*, *Cyanobacteria*, and some  
53 proteobacterial genera were found more abundant on particles, whilst overall proteins  
54 belonging to *Proteobacteria* were more dominant in the FL fraction. In contrast, significant  
55 functional differences including proteins involved in polysaccharide degradation, sugar- and  
56 phosphorus uptake, adhesion, motility, and stress response were detected.

## 57 **Introduction**

58 The oceans provide about one half of the global net primary production (NPP) (Field *et al.*,  
59 1998; Falkowski *et al.*, 1998; Azam and Malfatti, 2007), a large part of which is reprocessed  
60 by bacterioplankton in the so-called “microbial loop”, a pathway during which dissolved  
61 organic carbon is returned to higher trophic levels via its incorporation into bacterial biomass  
62 (Azam, 1998). Notably, about 20% of the bacterioplankton lives attached to algae or marine  
63 particles (Azam *et al.*, 1983). These marine particles consist of various kinds of organic  
64 matter, i.e. dead/dying zoo- or phytoplankton, bacterioplankton, as well as inorganic small  
65 particles held together by a sugary matrix consisting of polysaccharide-composed  
66 transparent extracellular particles (TEPs) composed of polysaccharides, which are exuded  
67 mostly by phytoplankton but also bacteria (Alldredge *et al.*, 1993). These particle-associated  
68 (PA) microbial communities present one of the most ancient forms of “multicellularity” (Hall-  
69 Stoodley *et al.*, 2004) and have adapted to thrive and survive in marine environments. Whilst  
70 some bacteria are only loosely associated with algae, others colonize algal surfaces  
71 (Grossart, 1999), where they form commensalistic or symbiotic communities with their host  
72 or even predate on algae (Sohn *et al.*, 2004; Amin *et al.*, 2012). Marine particles grow while  
73 sinking and thus contribute largely to the “biological pump” by transporting carbon to deeper  
74 waters and sediments (Volkman and Tanoue, 2002). These aggregates may reach several  
75 centimetres in diameter. They are enzymatically well equipped to metabolize high molecular  
76 weight substrates, thus providing nutrition to the attached community as well as leaving  
77 nutrients to the surrounding water column community (Simon *et al.*, 2002; Grossart, 2010).

78 About one decade ago, scientists started to link molecular systems biology of  
79 microorganisms to ecosystem level processes (e.g. reviewed in Raes and Bork, 2008).  
80 Metagenomic studies were initiated to provide valuable knowledge about diversity and  
81 distribution of microorganisms in natural environments. Moreover, metatranscriptomics and  
82 metaproteomics approaches were established to investigate, which genes are expressed at  
83 a given time point and which proteins are particularly abundant in complex biological  
84 systems. Metaproteomics has meanwhile widely proven its potential to revisit microbial

85 ecology concepts by linking genetic and functional diversity in microbial communities and  
86 relating taxonomic and functional diversity to ecosystem stability (Schneider and Riedel,  
87 2010). Numerous studies, describing large-scale proteome analyses of acid-mine drainage  
88 (AMD) biofilms (Ram *et al.*, 2005), wastewater treatment plants (Wilmes *et al.*, 2008), and  
89 fresh-water stream biofilms (Hall *et al.*, 2012) have demonstrated the power of  
90 metaproteomics to unveil molecular mechanisms involved in function, physiology, and  
91 evolution of surface-associated aquatic microbial communities. Marine metaproteomics has  
92 meanwhile been widely applied (Saito *et al.*, 2019; Wang *et al.*, 2014), in particular in  
93 habitats such as ocean scale shifts (Morris *et al.*, 2010), the Atlantic (Bergauer *et al.*, 2017)  
94 or Antarctic oceans (Williams *et al.*, 2012), e.g., to investigate *Roseobacter* clade (Christie-  
95 Oleza and Armengaud 2015) and bacterioplankton (e.g. Wöhlbrand *et al.*, 2017a) physiology.  
96 Teeling *et al.* (2012) studied the bacterioplankton response to a diatom bloom in the North  
97 Sea by an integrated meta-omics approach employing metagenomics and metaproteomics  
98 and provided strong evidence that distinct free-living (FL) populations of *Bacteroidetes*,  
99 *Gammaproteobacteria*, and *Alphaproteobacteria* specialized in a successive decomposition  
100 of algal-derived organic matter. As mentioned above, a significant fraction of decaying algal  
101 biomass is, however, mineralized by heterotrophic bacteria living on particles, which process  
102 a large fraction of the biosynthesized organic matter (Azam, 1998) and are thus greatly  
103 contributing to large-scale carbon fluxes (Battin *et al.*, 2003; Bauer *et al.*, 2006).

104 So far, the majority of the published studies focused on FL bacterioplankton, thereby  
105 leaving the PA bacterial communities largely unexplored. The particulate fraction of  
106 bacterioplankton has proven challenging to comprehensive meta-omics characterization, due  
107 to its high complexity, presence of DNA/protein-binding polysaccharides, process-interfering  
108 substances and lack of (meta)genomic information on marine particles (e.g. Wöhlbrand *et al.*,  
109 2017b), despite the fact that information on marine metagenomes is constantly growing  
110 (reviewed by Mineta and Gojobori 2016; Alma'abadi *et al.*, 2015). Previous experiments also  
111 indicate that a high abundance of eukaryotic proteins contributes to these challenges (Smith  
112 *et al.*, 2017; Saito *et al.*, 2019).

113 Our goal was therefore to establish a robust, reproducible and reliable pipeline  
114 enabling in-depth metaproteomics analyses of marine particles by testing different  
115 established protocols for their applicability for protein extraction from PA bacterioplankton in  
116 order to unravel the PA community's specific contribution to polysaccharide decomposition in  
117 marine habitats. As stated above, heterotrophic microbial communities are supposed to be  
118 well equipped to metabolize algal high molecular weight substrates (Simon *et al.*, 2002;  
119 Grossart, 2010). We thus hypothesize that these communities either differ taxonomically  
120 from their FL counterparts (as shown by Bizic-Ionescu *et al.* (2015)) and/or express different  
121 genes to adapt to the sessile life style and the availability of specific polysaccharides such as  
122 insoluble glycan fibres (as observed by Ganesh *et al.* (2014)). Moreover, we postulated that  
123 this adaption will mostly affect the expression of proteins involved in motility, adhesion, stress  
124 response as well as CAZymes together with appropriate sugar transporters. In order to test  
125 these hypotheses, a metaproteomics pipeline for marine particles was established and tested  
126 as a proof of concept on spring bloom samples collected in April 2009, for which the FL  
127 bacterial fraction had previously been characterized (Teeling *et al.*, 2012).

## 128 **Results and Discussion**

### 129 *Establishment of a metaproteomics pipeline for PA microbial communities*

130 As stated above, the metaproteomics analysis of PA microbial communities is severely  
131 hampered by their high complexity, the presence of a large proportion of eukaryotic proteins,  
132 the sugary particle-matrix as well as the lack of (meta)genomic information on PA-specific  
133 pro- and eukaryotes (Wöhlbrand *et al.*, 2017b; Saito *et al.*, 2019). Whilst the metaproteomics  
134 analyses by Teeing *et al.* (2012) and Kappelmann *et al.* (2019) of FL bacterioplankton  
135 (harvested on 0.2 µm filters) sampled during spring blooms from 2009 to 2012 at  
136 “Kabeltonne” Helgoland resulted in the identification of several thousand protein groups, the  
137 PA microbial communities retained on 3 and 10 µm pore-sized filters emerged as difficult to  
138 analyse by the integrated metagenomic/metaproteomic approach employed at that time.

139 We thus aimed to develop a suitable and effective metaproteomics pipeline for in-depth  
140 analyses of taxonomic composition and functionality of marine PA microbial communities. To  
141 this end, six different well-established protein extraction protocols for various particulate  
142 samples were tested using biomass from 3 µm and 10 µm pore-sized filters (assigned as PA  
143 fraction) of the MIMAS bio-archive ([www.mimas-project.de](http://www.mimas-project.de)) covering different stages of the  
144 bloom, which had been collected in 2009 during the spring phytoplankton bloom sampling  
145 campaign by Teeling *et al.* (2012). Moreover, various MS sample preparation protocols and  
146 different protein sequence databases were evaluated.

### 147 **[Table 1]**

148 **Protein extraction.** Efficient protein extraction is a crucial step for successful  
149 metaproteomics analyses of the microbial communities. In a first step, we therefore tested  
150 five different protein extraction methods that employ different strategies and that were  
151 already successfully applied for metaproteome analyses of microbial communities from  
152 different environments, i.e. sewage sludge (phenol extraction; Kuhn *et al.*, 2011), leaf litter  
153 (SDS-TCA; Schneider *et al.*, 2012), stream hyporheic biofilms (SDS-acetone; Hall *et al.*,

154 2012), hypersaline microbial mats (bead beating; Moog, 2012), and soil (freezing and  
155 thawing; Chourey *et al.*, 2010; Thompson *et al.*, 2008). In addition, the commercially  
156 available TRI-Reagent<sup>®</sup> (Sigma Aldrich) for simultaneous isolation of RNA, DNA and proteins  
157 was tested (**Table 1**). Filter samples used for protocol evaluation originated from several  
158 sampling dates in the 2009 spring bloom sampling campaign (9<sup>th</sup> of February, 7<sup>th</sup> of April, 21<sup>st</sup>  
159 of April, and 16<sup>th</sup> of June 2009). Filters were cut into pieces and subjected to the respective  
160 extraction protocol (**Fig. 1A**). Total protein amounts extracted from the filters by each of the  
161 applied methods were quite variable. Highest protein yield as determined by the Pierce<sup>™</sup>  
162 BCA Protein Assay and 1D SDS-PAGE was obtained using the SDS-acetone or bead  
163 beating approach (**Table 1; Fig. 1B**). In conclusion, SDS-acetone- and bead beating-based  
164 protocols turned out to be most efficient for protein extraction from particles and were  
165 therefore used for optimizing the downstream MS sample preparation procedure.

166 **MS sample preparation.** Total protein was extracted by the SDS-acetone and bead beating  
167 method from filters collected on 28<sup>th</sup> of April 2009 and separated by 1D SDS-PAGE (**Fig.**  
168 **1B**). Even though MS sample preparation via GeLC MS/MS is more time-consuming  
169 compared to 1D or 2D-LC approaches, it has been proven valuable to purify protein extracts  
170 and remove polymeric contaminants (e.g. Lassek *et al.* 2015; Keiblinger and Riedel, 2018)  
171 and yields comparable results as LC-based peptide fractionation (Hinzke *et al.*, 2019). To  
172 determine whether an increase in the total number of individual gel sub-fractions will lead to  
173 more protein identifications, gel lanes were cut in either 10 or 20 equal-sized fractions,  
174 proteins were *in gel* trypsin-digested and the resulting peptides were subjected to LC-MS/MS  
175 analysis. Moreover, we tested whether reduction and alkylation of the proteins prior to tryptic  
176 digestion increased protein identification rates (**Fig. 1B**). Searching the acquired spectra in  
177 the so far available 0.2  $\mu$ m 2009 (MIMAS) database (Teeling *et al.*, 2012) revealed that the  
178 best results (**Fig. 1B, Fig. S1**) were obtained by higher fractionation (20 gel pieces) without  
179 reduction and alkylation.

180 **[Figure 1]**



181 **Optimizing databases.** Metagenomic sequencing, assembling and annotation of FL (0.2  $\mu\text{m}$   
182 pore-sized filters) and PA (3 and 10  $\mu\text{m}$  pore-sized filters) fractions of water samples  
183 collected during the Helgoland spring bloom 2009 was performed in parallel to the  
184 optimization of the metaproteomics protocol (for details see experimental procedures).  
185 Unfortunately, the coverage and quality of the metagenome sequences of the large  
186 particulate fraction (10  $\mu\text{m}$  pore-sized filters) was not sufficient to be correctly assembled,  
187 annotated and translated. Thus, the metagenomic database used for subsequent database  
188 searches was only composed of sequences of FL bacteria (0.2  $\mu\text{m}$  pore-sized filters) and  
189 microbial communities present in the medium particulate fraction (3  $\mu\text{m}$  pore-sized filters).

190 The LC-MS/MS spectra obtained with the bead beating protocol were searched against  
191 four different databases to identify the database that results in the highest number of reliably  
192 identified protein groups (**Fig. S2**): (I) the non-redundant NCBI database (NCBI nr), (II) a  
193 database with Uniprot sequences from abundant bacteria and diatoms identified by Teeling  
194 *et al.* (2012) (PABD), (III) the database used by Teeling *et al.* (2012) containing proteins  
195 based on translated metagenomes of FL bacteria (0.2  $\mu\text{m}$  pore-sized filters from different  
196 sampling time points) of the spring bloom 2009 (MIMAS) and (IV) a database based on the  
197 metagenomes of the 0.2 and 3  $\mu\text{m}$  pore-sized filters from samples of the 14<sup>th</sup> of April 2009  
198 (0.2 + 3  $\mu\text{m}$  2009). Best results were obtained with the 0.2 + 3  $\mu\text{m}$  2009 database (**Fig. S2**),  
199 which is not surprising as the resolving power of metaproteome analyses relies heavily upon  
200 the database used for protein identification (e.g. Schneider and Riedel, 2010; Teeling *et al.*,  
201 2012). It is, moreover, well accepted that metaproteomic data are most informative in  
202 combination with complementary omics approaches, i.e. genomics and transcriptomics (e.g.  
203 Banfield *et al.*, 2005; Ram *et al.*, 2005).

204 Based on our results, we finally decided to use the bead beating-based protocol for  
205 protein extraction since this method resulted in more reproducible protein yields compared to  
206 the SDS-acetone extraction protocol (**Fig. 1B**). Furthermore, this method was less time-  
207 intensive compared to the SDS-acetone approach and resulted in the identification of the

208 highest number of unique protein groups, most probably due to the effective disintegration of  
209 the particulate matrix by EDTA added to the extraction buffer (Passow, 2002). In summary,  
210 the optimized metaproteomic pipeline for marine particles (**Fig. 2**) comprises protein  
211 extraction by bead beating, protein fractionation by 1D SDS-PAGE (20 fractions), followed by  
212 in-gel tryptic digestion, LC-MS/MS and database search against the matching metagenome  
213 database (0.2 + 3  $\mu\text{m}$  2009).

## 214 **[Figure 2]**

### 215 *Proof of principle – comparative metaproteome analyses of FL and PA bacterioplankton*

216 As proof of principle, the newly established protocol was applied for a comparative  
217 metaproteomic analysis of FL and PA microbial communities sampled at the 14<sup>th</sup> of April  
218 2009 in 0.2  $\mu\text{m}$  - 3  $\mu\text{m}$  (= FL), 3 - 10  $\mu\text{m}$  and  $\geq$  10  $\mu\text{m}$  (= PA) fractions. Five technical  
219 replicates of each sample were subjected to the final optimized workflow and the resulting  
220 MS/MS-data were searched against the matching metagenome-based database (0.2 + 3  $\mu\text{m}$   
221 2009). Employing our optimized pipeline, we were able to record 460,000, 360,000, and  
222 440,000 spectra, which subsequently led to the identification of 9,354 protein groups (19.4%  
223 of spectral IDs), 2,263 protein groups (10.2% of spectral IDs), and 2,771 protein groups  
224 (10.7% of spectral IDs) for the 0.2 - 3  $\mu\text{m}$  (**Table S1**), 3 - 10  $\mu\text{m}$  (**Table S2**), and  $\geq$  10  $\mu\text{m}$   
225 (**Table S3**) fractions, respectively. This is, at least to our knowledge, the largest number of  
226 protein groups ever identified for marine particles. Comparable studies addressing  
227 metaproteomic analyses of marine sediments of the Bering Sea (Moore *et al.*, 2012), the  
228 coastal North Sea, and the Pacific Ocean (Wöhlbrand *et al.*, 2017b) identified less than 10%  
229 of the protein identification numbers resulting from the here presented novel metaproteomic  
230 pipeline.

231 1,956 of the identified protein groups of the two PA fractions were also identified in the  
232 FL fraction and only 276 proteins were exclusively found in the PA fractions (**Fig. S3**). This  
233 suggests that protein expression profiles of planktonic and particulate bacteria vary less than

234 expected. However, this might also be due to the fact that PA bacteria are known to hop on  
235 and off particles and, e.g. as offspring cells searching for a place to settle, may thus only  
236 temporarily be part of the planktonic community (Ghiglione *et al.*, 2007; Grossart, 2010;  
237 Crespo *et al.*, 2013). Moreover, clogging of filter pores by particles may cause retention of FL  
238 bacteria thus contaminating the PA fractions by planktonic bacteria. In addition, the lack of  $\geq$   
239 10  $\mu\text{m}$  pore-sized filter metagenomic sequences hampers comprehensive protein  
240 identifications in this PA fraction that may result in a virtually lower abundance than  
241 expected.

242 **Taxonomic differences between FL and PA bacterioplankton.** Besides the somewhat  
243 unexpected similarity of the FL and PA metaproteomic datasets, the phylogenetic  
244 assignment of the identified protein groups indicated some notable taxonomic differences  
245 between the FL and PA fractions (**Fig. 3, Table S4**).

#### 246 **[Figure 3]**

247 The number of eukaryotic protein groups was significantly higher in the PA fractions  
248 (**Fig. 3A**) and comprised 43% and 54% of the protein groups identified for the 3 - 10  $\mu\text{m}$  and  
249  $\geq 10 \mu\text{m}$  fractions, respectively, in contrast to only 11% of the protein groups identified for the  
250 FL phytoplankton. Moreover, the number of viral protein groups was found to be almost three  
251 times higher in the two particulate fractions when compared to their planktonic counterpart  
252 (**Fig. 3A**). The most abundant phyla within both, the FL and PA fractions, were  
253 *Proteobacteria* (FL 55%; PA 41% and 39%, 3  $\mu\text{m}$  and 10  $\mu\text{m}$  pore-sized filters) and  
254 *Bacteroidetes* (FL 40%; PA 48% and 47%, 3  $\mu\text{m}$  and 10  $\mu\text{m}$  pore-sized filters). Proteins  
255 expressed by *Alpha*-, *Beta*- and *Gammaproteobacteria* were generally more dominant in the  
256 FL bacteria, whilst proteins assigned to *Cyanobacteria* (e.g. *Synechococcus*, *Arthrospira*),  
257 *Opitutae*, *Flavobacteriia* (e.g. *Arenitalea*, *Olleya*, *Algibacter*, *Lacinutrix*), and some  
258 proteobacterial genera (e.g. *Oceanicoccus*, *Candidatus Puniceispirillum*, *Neptuniibacter*,  
259 *Halioglobus*, *Ramlibacter*) were more abundant in the PA fraction (**Fig. 3B**). This is in good  
260 accordance to other studies confirming that *Bacteroidetes* have been identified in both, FL

261 and PA, bacterioplankton (DeLong *et al.*, 1993; Eilers *et al.*, 2001; Abell and Bowman, 2005;  
262 Alonso *et al.*, 2007). Moreover, *Flavobacteriia* have been found highly abundant during  
263 phytoplankton blooms indicating that they play an important role as consumers of algal-  
264 derived organic matter (Simon *et al.*, 1999; Riemann *et al.*, 2000; Pinhassi *et al.*, 2004;  
265 Grossart *et al.*, 2005; Teeling *et al.*, 2016; Chafee *et al.*, 2018).

266 **Functional differences between FL and PA bacterioplankton.** Notably, differences in the  
267 protein profiles between FL and PA bacteria were more evident on the functional level (**Fig.**  
268 **4**). Most importantly, the SusC/D utilization system, specific glycoside hydrolases, i.e. GH  
269 family 1, 13, and 16 (including beta-glucosidases, alpha-1,4-amylases, and exo- and endo-  
270 1,3-beta-glycanases), glycosyl transferases and TonB-dependent transporters were found  
271 with higher overall expression levels in the PA fractions compared to the FL fraction (**Fig.**  
272 **4A**). This is in good accordance with the high substrate availability (Caron *et al.*, 1982;  
273 Grossart *et al.*, 2003; Fernández-Gómez *et al.*, 2013), especially the presence of highly  
274 abundant microalgae storage polysaccharides, i.e. alpha- and beta-glucans (Kroth *et al.*,  
275 2008), in the particles. Sulfatases, capable of cleaving sulphate sugar ester bonds, are  
276 contributing to the degradation of specific sulphated algal polysaccharides such as mannans  
277 and fucans (Gómez-Pereira *et al.*, 2012). This is well supported by our finding that sulfatases  
278 are strongly expressed by PA *Flavobacteriia*, especially *Formosa* sp. (**Fig. 4A & B**).

#### 279 **[Figure 4]**

280 FL and PA bacteria seem to employ different phosphate acquisition strategies: whilst in  
281 FL bacteria phosphate and phosphonate ABC-type transporters appeared highly expressed,  
282 PA bacteria rather seem to employ phytases and phosphate-selective porins. As expected,  
283 various proteins involved in stress response were differentially expressed. Interestingly,  
284 functions involved in oxidative stress defense appeared to be less abundant in the PA  
285 fraction (maybe due to shading, reducing solar irradiation stress in the particles), whilst  
286 proteins for heavy metal and antibiotic resistance were strongly expressed in the  $\geq 10 \mu\text{m}$   
287 fraction, which also contained the highest proportion of eukaryotic proteins (**Fig. 4A**). This

288 might be due to the fact that some algae take up and store heavy metals (Gaudry *et al.*,  
289 2007) and are capable of producing antibiotics (Grossart, 1999). This indicates that close  
290 eukaryote-bacterial interactions in particles require such defense strategies of the associated  
291 bacteria. As expected, adhesion proteins as well as proteins involved in motility, i.e. flagella  
292 and type IV-pili, were more abundant on the particles, emphasizing their importance for  
293 biofilm/aggregate formation (O'Toole & Kolter, 1998; Lemon *et al.*, 2007; Houry *et al.*, 2010;  
294 Burke *et al.*, 2011). Interestingly, proteorhodopsin, an inner membrane protein involved in  
295 light-dependent energy generation, which has been proposed to enable FL bacteria such as  
296 *Polaribacter* (Fernández-Gómez *et al.*, 2013) and *Pelagibacter* (Giovannoni *et al.*, 2005) to  
297 survive under low nutrient conditions, was also abundantly identified in PA bacteria such as  
298 *Polaribacter*, *Paraglaciicola*, and *Marinosulfomonas* in our analyses.

299 **Eukaryotes are highly abundant and might contribute to polysaccharide degradation**  
300 **on marine particles.** Our metaproteomics data demonstrate a high abundance of  
301 eukaryotes on the particles (**Fig. 5**). Preliminary analyses indicate that these include  
302 numerous microalgal groups, e.g. diatoms, *Pelagophytes*, *Raphidiophytes*, *Cryptophytes*,  
303 *Dinoflagellates* and *Haptophytes*, but also fungi and various protozoa (**Table S2 and S3**).  
304 This clearly sets particles apart from the FL fraction and highlights the importance of direct  
305 eukaryote-bacterial interactions in particles. Previous work on FL bacteria showed that  
306 bacterial succession was largely independent of phytoplankton composition, and instead  
307 determined by broad substrate availability (Teeling *et al.*, 2016). PA bacterial composition is  
308 more likely to be directly controlled by algal composition due to the intimate nature of their  
309 interactions (Grossart *et al.*, 2005), although functional redundancy may be substantial  
310 (Burke *et al.*, 2011). Moreover, eukaryotes may also contribute to polysaccharide  
311 degradation in concert with bacteria. For example, fungal taxa can be abundant in marine  
312 particles and have been shown to utilize algal polysaccharides such as laminarin  
313 (Bochdansky *et al.*, 2016; Cunliffe *et al.*, 2017).

314 **[Figure 5]**

## 315 *Conclusions and outlook*

316 Our comparative metaproteomic analyses of marine microbial communities living either  
317 planktonically or attached to particles resulted in an as yet unequalled number of identified  
318 protein groups for marine particles. Interestingly, the great overlap between metaproteomes  
319 of FL and PA heterotrophic bacterial communities indicates that taxonomic differences  
320 between them might be less pronounced than previously thought. This might be due to the  
321 fact that (I) FL bacteria can rapidly adapt to the surface-associated life style, as the majority  
322 of these bacteria seems to be also present on the particles and proteins important for biofilm-  
323 formation, i.e. motility and adhesion proteins, are also expressed when living planktonically,  
324 and that (II) FL or PA-specific bacteria are frequently hopping on and off the particles.  
325 Notably, there is strong evidence that bacteria, when living on the particles, express life style-  
326 specific functions, i.e. special CAZymes, sugar transporters and proteins involved in certain  
327 stress responses, which enable them to cope with the unique living conditions on marine  
328 particles.

329 Although our optimized metaproteomic workflow significantly improved the identification  
330 rate of PA proteins, the number of protein identifications from the particles is still  
331 considerably lower compared to FL bacterial communities. We assume that especially the  
332 high abundance of eukaryotic proteins poses problems in protein identification due to the  
333 complexity and diversity of microbial eukaryote genomes and the presence of introns and  
334 repeats in the metagenomic DNA sequence databases, which hinders peptide identification  
335 (Saito *et al.*, 2019). Metaproteome coverage of marine particles could be significantly  
336 improved by employing customized databases including eukaryotic metatranscriptomic  
337 (RNA-based) sequence data (Keeling *et al.*, 2014). This can be achieved by generating  
338 metatranscriptomes from the particular fractions. Alternatively, protein identification could  
339 also be substantially improved by extracting already existing metatranscriptomic and  
340 metagenomic data from relevant eukaryotic taxa from public databases. Key to the latter  
341 approach is reliable information on which eukaryotic organisms make up the particles, which

342 can be attained by 18S rRNA gene amplicon sequencing. Perspective, we will extend our  
343 analyses on eukaryotic taxa and analyse multiple time points during phytoplankton bloom to  
344 investigate succession of taxonomical clades and expressed functions of marine particles  
345 from pre-bloom to post-bloom conditions.

## 346 **Experimental Procedures**

347 **Bacterial biomass samples.** Sampling of bacterioplankton was performed as described  
348 previously (Teeling *et al.*, 2012). Briefly, surface water samples were taken during spring  
349 2009 at the station “Kabeltonne” (50° 11.3’ N, 7° 54.0’ E) between the main island Helgoland  
350 and the minor island Düne about 40 km offshore in the southeastern North Sea in the  
351 German Bight. Bacterial biomass for protein extraction was sequentially filtered with  
352 peristaltic pumps onto 10 µm, 3 µm, and 0.2 µm pore-sized filters (142 mm diameter) to  
353 separate PA and FL bacteria. All filters were stored at -80 °C until further analyses.

354 **Testing of protein extraction protocols.** To test six different existing protein extraction  
355 protocols for their applicability on PA bacteria, filters from several time points containing  
356 varying amounts of biomass were chosen. Sample preparation for the metaproteomic  
357 analysis included cutting the filters into quarters and subsequently into small pieces (1-2 mm  
358 in diameter). Pieces of one quarter filter were transferred into 15 ml falcon tubes and treated  
359 according to the respective protocol.

360 *Protocol 1 - Phenol.* Filter pieces were incubated in 2.4 ml of a 0.1 M NaOH solution for 10  
361 min at room temperature and were then sonicated three times for 30 s at 20% power output  
362 (Sonopuls HD2200 with microtip MS 73; Bandelin electronic, Germany). Subsequently the  
363 sample was centrifuged for 15 min at 12,500 x g at 20 °C to separate the supernatant from  
364 the filter pieces. The supernatant was transferred into a new tube and protein extraction  
365 using phenol was performed according to the protocol published by Kuhn and colleagues  
366 (Kuhn *et al.*, 2011).

367 *Protocol 2 - SDS-TCA.* Filter pieces were mixed with 5 ml extraction buffer (1% (w/v) SDS,  
368 50 mM Tris/HCl, pH 7.0) and vigorously shaken for 2 min at room temperature. The cell  
369 disruption by sonication, boiling and shaking was performed according to the protein  
370 extraction protocol published by Schneider and colleagues (Schneider *et al.*, 2012).  
371 Subsequently, proteins were precipitated with 10% TCA over night at 4 °C. The precipitated



372 proteins were centrifuged for 20 min at 12,500 x g at 4 °C and the pellet was washed two  
373 times in ice-cold acetone.

374 *Protocol 3 - TRI-Reagent®*. The TRI-Reagent® (Sigma-Aldrich, product-number T9424) is  
375 used for the simultaneous isolation of RNA, DNA, and proteins. Filter pieces were transferred  
376 into 4 ml TRI-Reagent and shaken vigorously for 5 min. Subsequently the proteins were  
377 extracted according to the manufacturer's guidelines.

378 *Protocol 4 - Freeze and Thaw*. Protein extraction was carried out according to a combination  
379 of the extraction protocols of Chourey *et al.* (2010) and Thompson *et al.* (2008). To this end,  
380 filter pieces were mixed with 4 ml lysis buffer (5% SDS, 50 mM Tris/HCl, 0.1 mM EDTA,  
381 0.15 M NaCl, 1 mM MgCl<sub>2</sub>, 50 mM DTT, pH 8.5) and vigorously shaken for 3 min.  
382 Subsequently, the samples were boiled for 10 min, followed by two freezing and thawing  
383 cycles with liquid nitrogen. After cooling at 4 °C the samples were vigorously shaken for  
384 3 min. To remove cell debris, samples were centrifuged for 20 min at 12,500 x g at 4 °C. The  
385 proteins in the supernatant were precipitated with 25% TCA over night at 4 °C. Precipitated  
386 proteins were centrifuged for 20 min at 12,500 x g at 4 °C and the resulting protein pellet was  
387 washed with ice-cold acetone.

388 *Protocol 5 - SDS-Acetone*. Filter pieces were mixed with 5 ml extraction buffer (50 mM Tris,  
389 1% (w/v) SDS, pH 7.5) and vortexed vigorously. Proteins were extracted by sonication,  
390 boiling and shaking as described by Hall and colleagues (Hall *et al.*, 2012). Subsequently,  
391 proteins were precipitated with five volumes acetone over night at -20 °C. The precipitated  
392 proteins were centrifuged for 20 min at 12,500 x g at 4 °C and the pellet washed two times in  
393 ice-cold acetone.

394 *Protocol 6 – bead beating*. Protein extraction was carried out according to the extraction  
395 protocol of Moog (2012), which is based on the protocol of Teeling and colleagues (Teeling  
396 *et al.*, 2012). To this end, filter pieces were covered with 4 ml lysis buffer (0.1 M DTT, 0.01 M  
397 EDTA, 10% Glycerol (v/v), 1.7 mM PMSF, 5% SDS (w/v), 0.05 M Tris/HCl, pH 6.8) and 2 ml  
398 glass beads (0.1 – 0.11 mm diameter) were added. The cells on the filter pieces were

399 subsequently disrupted four times for 30 s with 6.5 m/s via bead beating with a Fast Prep™-  
400 24 (MP Biomedicals, Germany). To remove cell debris and glass beads, samples were  
401 centrifuged for 20 min at 12,500 x g at 4 °C and the supernatant was transferred into new  
402 tubes. This washing step was repeated 2 to 4 times until the beads were colourless. The  
403 glass beads were washed with 3 ml lysis buffer and vigorously shaken. Proteins enriched in  
404 the pooled supernatants were precipitated with 1:4 acetone at -20 °C over night. Precipitated  
405 proteins were centrifuged for 20 min at 12,500 x g at 4 °C and the resulting protein pellet  
406 washed with ice-cold acetone.

407 All resulting protein pellets were air-dried and resolved in 8 M urea / 2 M thiourea.

408 **Determination of protein concentrations.** . Protein concentrations were determined using  
409 the Pierce™ BCA Protein Assay Kit (Thermo Fisher Scientific). Protein extracts were  
410 prepared with the Compat-Able™ Protein Assay Preparation Reagent Kit (Thermo Fisher  
411 Scientific) according to the manufacturer's guidelines.

412 **SDS-PAGE protein separation.** 30 µg protein or 30 µl protein extract was mixed with  
413 4x SDS sample buffer (20% glycerol, 100 mM Tris/HCl, 10% (w/v) SDS, 5% β-  
414 mercaptoethanol, 0.8% bromphenol blue, pH 6.8) and loaded on TGX precast 4-20% gels  
415 (Biorad, Germany). Samples were separated by electrophoresis at 150 V for 45 min. After  
416 fixation (10% acetic acid, 40% ethanol, 30 min) the gels were stained with Brilliant Blue G250  
417 Coomassie and imaged.

418 **Protein digestion and MS-sample preparation.** Three different protocols were tested on  
419 proteins extracted from 3 µm and 10 µm filters.

420 *Protocol 1 - 10 gel pieces.* Protein lanes were cut into 10 equal-sized pieces and washed  
421 with a buffer containing 50 mM ammoniumbicarbonate and 30% (v/v) acetonitrile. Prior to  
422 tryptic digestion, gel pieces were dried in a vacuum concentrator and re-swollen with 2 ng/µl  
423 trypsin solution (sequencing grade trypsin, Promega, USA) followed by overnight digestion at  
424 37 °C. After digestion the gel pieces were covered with water and peptides were eluted from

425 the gel in an ultrasonic bath. The eluted peptides were desalted with C18 Millipore® ZipTip  
426 columns (Millipore) according to the manufacturer's guidelines.

427 *Protocol 2 - 20 gel pieces.* The protein lanes were cut into 20 equal-sized pieces and treated  
428 as described above.

429 *Protocol 3 - 20 gel pieces with reduction and alkylation.* The protein lanes were cut into 20  
430 equal pieces and washed with a buffer containing 100 mM ammoniumbicarbonate  
431 ( $\text{NH}_4\text{HCO}_3$ ) and 50% (v/v) methanol. Subsequently, proteins were reduced in 50 mM  
432  $\text{NH}_4\text{HCO}_3$  containing 10 mM DTT for 30 min at 60 °C, followed by alkylation in 50 mM  
433  $\text{NH}_4\text{HCO}_3$  containing 50 mM iodoacetamide (IAA) for 60 min in the dark at room temperature.  
434 Prior to tryptic digestion, the gel pieces were dehydrated using 100% acetonitrile and dried,  
435 re-swollen with 2 ng/ $\mu\text{l}$  trypsin solution and incubated at 37 °C over night. Peptides were  
436 eluted from the gel pieces by a six-step procedure, using acetonitrile, 1% (v/v) acetic acid in  
437 water, acetonitrile, 10% (v/v) acetic acid and two times acetonitrile. Peptide-containing  
438 supernatants were pooled and completely dried in a vacuum concentrator. Samples were  
439 subsequently resolved in buffer A (5% (v/v) acetonitrile, 0.1% (v/v) formic acid) and desalted  
440 with C18 Millipore® ZipTip columns (Millipore) according to the manufacturer's guidelines.

#### 441 **Constructions of a protein sequence database from marine particle metagenomes.**

442 Environmental DNA was extracted from the 0.2  $\mu\text{m}$ , 3  $\mu\text{m}$  and 10  $\mu\text{m}$  pore-sized filters  
443 sampled on the 14<sup>th</sup> of April 2009 by a modified standard protocol of Zhou *et al.* (1996). In  
444 detail one polycarbonate filter was cut into 4 pieces and mixed with 13.5 ml extraction buffer  
445 (100 mM Tris-HCl (pH 8.0), 100 mM EDTA (pH 8.0), 100 mM Na-phosphate (pH 8.0), 1.5 M  
446 NaCl, 1% CTAB (Hexadecyltrimethylammonium-bromide)). Subsequently 100  $\mu\text{l}$  10 mg/ml  
447 Proteinase K was added and the sample was incubated shaking at 37 °C for 30 min. 1.5 ml  
448 20% SDS was added and the sample was incubated shaking at 65 °C for 2 h. The sample  
449 was centrifuged at 6,000 x g for 10 min at room temperature and the supernatants were  
450 transferred to fresh tubes. Subsequently, an equal volume of chloroform/isoamylalcohol was  
451 added and the sample was mixed carefully by shaking and was centrifuged at 10,000 x g for

452 10 min at room temperature. Afterwards the aqueous upper phase was transferred into a  
453 new tube and the DNA was precipitated by addition of 0.6 volumes isopropanol. The sample  
454 was moderately shaken over night at 4°C. After centrifugation at 50,000 x g for 20 min at  
455 room temperature, the pellet was washed with 10 ml 80% (v/v) ethanol and dried. The pellet  
456 was resuspended in 200 µl TE buffer (10 mM Tris-HCl, 1 mM EDTA, pH 7) and stored at -20  
457 °C until sequencing.

458 DNA was sequenced at the Max Planck Sequencing Centre (Cologne, Germany), using the  
459 Illumina HiSeq 2500 platform and 2 x 250 bp chemistry. Sequences were then trimmed using  
460 bbduk v35.14 (<http://btools.jgi.doe.gov>) with the following parameters: ktrim = r k = 28  
461 mink = 12 hdist = 1 tbo = t tpe = t qtrim = rl trimq = 20 minlength = 100. Read quality for each  
462 sample was then confirmed using FastQC v0.11.2 (Andrews, 2010). Trimmed and filtered  
463 reads from the three metagenomic datasets were then assembled individually. The 0.2 µm  
464 pore-sized filter sample was assembled with metaSPAdes v3.10.1 (Nurk *et al.*, 2017) with  
465 kmers of length 21, 33, 55, 77, 99, and 127, and error correction mode switched on.  
466 Assembly of the larger size fraction was done with MEGAHIT v1.1.3 (Li *et al.*, 2016) with  
467 kmers 21, 33, 55, 77, 99, 127, 155, 183, and 211. Assembled contigs longer than 1500 base  
468 pairs were kept for gene predictions. Genes were predicted and annotated using Prokka  
469 v1.11 (Seeman, 2014), which implements prodigal v2.6.3 (Hyatt *et al.*, 2010) for ORF  
470 prediction.

471 Raw read sequences and assembled contig sequences have been deposited in the  
472 European nucleotide archive (ENA) under the project accession number PRJEB2888.

473 **LC-MS/MS data acquisition and data analysis.** Peptides were separated by reversed-  
474 phase chromatography on an Easy-nLC 1000 (Thermo Scientific) with self-packed C18  
475 analytical columns (100 µm × 20 cm) and coupled to a LTQ Orbitrap Velos mass  
476 spectrometer(Thermo Scientific) using a non-linear binary gradient of 80 minutes from 5 %  
477 solvent A (0.1 % (v/v) acetic acid) to 99 % solvent B (0.1 % acetic acid (v/v), 99.9 %  
478 acetonitrile (v/v)) and a flow rate of 300 nl/min. Survey scans at a resolution of 30,000 were

479 recorded in the Orbitrap analyser (m/z 300 - 1700) and the 20 most intense precursor ions  
480 were selected for CID fragmentation in the LTQ. Dynamic exclusion of precursor ions was  
481 enabled; single-charged ions and ions with unknown charge state were excluded from  
482 fragmentation. Internal lock mass calibration was enabled (lock mass 445.120025).

483 The mass spectrometry raw data were converted into mgf files using MSConvert (64-bit,  
484 Proteowizard 3) and subsequently subjected to database searching via Mascot (Matrix  
485 Science; version 2.6.0). Four different protein sequence databases were used for peptide to  
486 spectrum matching: I) the non-redundant NCBI database (NCBI nr - NCBIprot\_20171030  
487 database (136,216,794 entries)), II) a database containing protein sequences of abundant  
488 bacteria and diatoms (PABD) based on the study of Teeling *et al.* (2012), and retrieved from  
489 Uniprot KB (Uniprot\_DoS\_complete\_20170829 database (2,638,314 entries)), III) a database  
490 containing protein sequences of the free-living fraction from Teeling *et al.* (2012) (0.2 µm  
491 2009 (MIMAS) - MIMAS\_forward\_reverse\_all\_contaminants database (1,579,724 entries)),  
492 and IV) a database based on translated metagenomes from 0.2 µm and 3 µm filters (see  
493 below for details) (0.2 + 3 µm 2009 - 02\_plus\_3\_POMPU\_nr97\_fw\_cont\_20181015 database  
494 (1,463,571 entries). Mascot was searched with a fragment ion mass tolerance of 0.80 Da  
495 and a parent ion tolerance of 10.0 ppm. Oxidation of methionine was specified as a variable  
496 modification, trypsin was set as digestion enzyme and a maximum of two missed cleavages  
497 was allowed.

498 Scaffold (version Scaffold\_4.8.7, Proteome Software Inc.) was used to validate MS/MS  
499 based peptide and protein identifications. Peptide identifications were accepted if they could  
500 be established at greater than 95.0% probability by the Peptide Prophet algorithm (Keller *et*  
501 *al.*, 2002) with Scaffold delta-mass correction. Protein identifications were accepted if they  
502 could be established at greater than 99.0% probability and contained at least one identified  
503 peptide. Protein probabilities were assigned by the Protein Prophet algorithm (Nesvizhskii *et*  
504 *al.*, 2003). Proteins that contained similar peptides and could not be differentiated based on  
505 MS/MS analysis alone were grouped to satisfy the principles of parsimony. Peptides that

506 were only found in one of the replicates were excluded from the following data analysis.  
507 Mass spectrometry proteomics data have been deposited to the ProteomeXchange  
508 Consortium via the PRIDE partner repository (Perez-Riverol *et al.*, 2019) with the data set  
509 identifier PXD12699 (reviewer account details: username reviewer9795@ebi.ac.uk;  
510 password 5CKUi0AF).

511 For further data analysis, the software *ProPHAnE* (Proteomics result Pruning and Homology  
512 group Annotation Engine; version 3.1.1) (Schneider *et al.*, 2011) was used. For the  
513 taxonomical classification of the identified protein groups the NCBI NR database (version  
514 2018-08-02; e-value 0.01, query cover 0.9, max-target-seqs 1) and the diamond blastp  
515 algorithm (version 0.8.22) were used. For functional classification of the identified protein  
516 groups the eggmap database (version 4.5.1, downloaded at 2018-07-31) and the algorithm  
517 e-mapper were used.

518 A list of common contaminants was added to all translated ORF sequences found by  
519 metagenome analysis of the 0.2 µm and 3 µm filters from the sampling date 14<sup>th</sup> of April  
520 2009. Redundant sequences were eliminated (97% redundancy, elimination of shorter  
521 sequence) using CD-HIT ([www.cdhit.org](http://www.cdhit.org)), a program for clustering and comparing protein or  
522 nucleotide sequences, resulting in the database  
523 02\_plus\_3\_POMPU\_nr97\_fw\_cont\_20181015 (1,463,571 entries).

524

## 525 **Acknowledgements.**

526 We thank the DFG for financial support (RI 969/9-1) in the frame of the Research Unit  
527 “POMPU” (FOR 2406). We are grateful to Sabine Kühn for technical assistance and to  
528 Thomas Schweder for helpful discussions.

529

530

531 **References**

- 532 Abell, G.C.J., and Bowman, J.P. (2005) Colonization and community dynamics of class  
533 Flavobacteria on diatom detritus in experimental mesocosms based on Southern Ocean  
534 seawater. *FEMS Microbiol Ecol* **53**: 379-391.
- 535 Alma'abadi, A.D., Gojobori, T., and Mineta, K. (2015) Marine metagenome as a resource for  
536 novel enzymes. *GPB* **13**: 290-295.
- 537 Alldredge, A.L., Passow, U., and Logan, B. (1993) The existence, abundance, and  
538 significance of large transparent exopolymer particles in the ocean. *Deep-Sea Res I* **40**:  
539 1131-1140.
- 540 Alonso, C., Warnecke, F., Amann, R., and Pernthaler, J. (2007) High local and global  
541 diversity of Flavobacteria in marine plankton. *Environ Microbiol* **9**: 1253-1266.
- 542 Amin, S.A., Parker, M.S., and Armbrust, E.V. (2012) Interactions between Diatoms and  
543 Bacteria. *MMBR* **76**: 667-684.
- 544 Andrews, S. (2010) FastQC: a quality control tool for high throughput sequence data.  
545 Available online at: <http://www.bioinformatics.babraham.ac.uk/projects/fastqc>
- 546 Azam, F., Fenchel, T., Field, J.G., Gray, J.S., Meyer-Reil, L.A., and Thingstad, F. (1983) The  
547 Ecological Role of Water-Column Microbes in the Sea. *Mar Ecol Prog Ser* **10**: 257-263.
- 548 Azam F. (1998) Microbial control of Oceanic carbon flux: the plot thickens. *Science* **280**: 694-  
549 696.
- 550 Azam, F., and Malfatti, F. (2007) Microbial structuring of marine ecosystems. *Nature Reviews*  
551 **5**: 782-791.
- 552 Banfield, J.F., Verberkmoes, N.C., Hettich, R.L., and Thelen, M.P. (2005) Proteogenomic  
553 approaches for the molecular characterization of natural microbial communities. *OMICS* **9**:  
554 301-333.
- 555 Battin, T.J., Kaplan, L.A., Denis Newbold, J., and Hansen, C.M. (2003) Contributions of  
556 microbial biofilms to ecosystem processes in stream mesocosms. *Nature* **426**: 439-442.



- 557 Bauer, M., Kube, M., Teeling, H., Richter, M., Lombardot, T., Allers, E., *et al.* (2006) Whole  
558 genome analysis of the marine *Bacteroidetes* '*Gramella frosetii*' reveals adaptations to  
559 degradation of polymeric organic matter. *Environ Microbiol* **8**: 2201-2213.
- 560 Bergauer, K., Fernandez-Guerra, A., Garcia, J.A.L., Sprenger, R.R., Stepanauskas, R.,  
561 Pachiadaki, M.G., *et al.* (2018) Organic matter processing by microbial communities  
562 throughout the Atlantic water column as revealed by metaproteomics. *Proc Natl Acad Sci*  
563 *U S A* **115**: E400-E408.
- 564 Bižić-Ionescu, M., Zeder, M., Ionescu, D., Orlić, S., Fuchs, B.M., Grossart, H.P., *et al.* (2015)  
565 Comparison of bacterial communities on limnic versus coastal marine particles reveals  
566 profound differences in colonization. *Environ Microbiol* **17**: 3500-3514.
- 567 Bochdansky, A.B., Clouse, M.A., and Herndl, G.J. (2016). Eukaryotic microbes, principally  
568 fungi and labyrinthulomycetes, dominate biomass on bathypelagic marine snow. *ISME J*  
569 **11**: 362-373.
- 570 Burke, C., Steinberg, P., Kjelleberg, S., and Thomas, T. (2011) Bacterial community  
571 assembly based on functional genes rather than species. *PNAS* **108**: 14288-14293.
- 572 Caron, D.A., Davis, P.G., Madin, L.P., and Sieburth, J.M. (1982) Heterotrophic bacteria and  
573 bacterivorous protozoa in oceanic macroaggregates. *Science* **218**: 795-797.
- 574 Chafee, M., Fernández-Guerra, A., Buttigieg, P.L., Gerds, G., Eren, A.M., Teeling, H., *et al.*  
575 (2018) Recurrent patterns of microdiversity in a temperate coastal marine environment.  
576 *ISME J* **12**: 237-252.
- 577 Chourey, K., Jansson, J., VerBerkmoes, N., Shah, M., Chavarria, K.L., Tom, L.M., *et al.*  
578 (2010) Direct cellular lysis/protein extraction protocol for soil metaproteomics. *J Proteome*  
579 *Res* **9**: 6615-6622.
- 580 Christie-Oleza, J.A., and Armengaud, J. (2015) Proteomics of the Roseobacter clade, a  
581 window to the marine microbiology landscape. *Proteomics* **15**: 3928-3942.
- 582 Crespo, B.G., Pommier, T., Fernández-Gómez, B., and Pedrós-Alió, C. (2013) Taxonomic  
583 composition of the particle-attached and free-living bacterial assemblages in the  
584 Northwest Mediterranean Sea. *Microbiology Open* **2**: 541-552.



- 585 Cunliffe, M., Hollingsworth, A., Bain, C., Sharma, V., and Taylor, J.D. (2017) Algal  
586 polysaccharide utilisation by saprotrophic planktonic marine fungi. *Fungal Ecol* **30**: 135-  
587 138.
- 588 DeLong, E.F., Franks, D.G., and Alldredge, A.L. (1993) Phylogenetic diversity of aggregate-  
589 attached vs. free-living marine bacterial assemblages. *Limnol Oceanogr* **38**: 924-934.
- 590 Eilers, H., Pernthaler, J., Peplies, J., Glöckner, F.O., Gerdt, G., and Amann, R. (2001)  
591 Isolation of novel pelagic bacteria from the German Bight and their seasonal contribution  
592 to surface picoplankton. *AEM* **67**: 5134-5142.
- 593 Falkowski, P.G., Barber, R.T., and Smetacek, V. (1998) Biogeochemical controls and  
594 feedbacks on ocean primary production. *Science* **281**: 200-206.
- 595 Fernández-Gómez, B., Richter, M., Schüller, M., Pinhassi, J., Acinas, S., González, J.M. *et*  
596 *al.* (2013) Ecology of marine Bacteroidetes. A comparative genomics approach. *ISME J* **7**:  
597 1026-1037.
- 598 Field, C.B., Behrenfeld, M.J., Randerson, J.T., and Falkowski, P. (1998) Primary production  
599 of the biosphere: integrating terrestrial and oceanic components. *Science* **281**: 237-240.
- 600 Ganesh, S., Parris, D.J., DeLong, E.F., and Stewart, F.J. (2014) Metagenomic analysis of  
601 size-fractionated picoplankton in a marine oxygen minimum zone. *ISME J* **8**: 187-211.
- 602 Gaudry, A., Zeroual, F., Gaie-Levrel, F., Moskura, M., Boujral, F.Z., Cherkaoui, E. *et al.*  
603 (2007) Heavy metals pollution of the atlantic marine environment by the Moroccan  
604 phosphate industry, as observed through their bioaccumulation in *Ulva lactuca*. *Water Air*  
605 *Soil Pollut* **178**: 267-285.
- 606 Ghiglione, J.F., Mevel, G., Pujo-Pay, M., Mousseau, L., Lebaron, P., and Goutx, M. (2007)  
607 Diel and seasonal variations in abundance, activity, and community structure of particle-  
608 attached and free living bacteria in NW Mediterranean Sea. *Microb Ecol* **54**: 217-231.
- 609 Giovannoni, S.J., Tripp, H.J., Givan, S., Podar, M., Vergin, K.L., Baptista, D., *et al.* (2005)  
610 Genome Streamlining in a Cosmopolitan Oceanic Bacterium. *Science* **309**: 1242-1245.

- 611 Gómez-Pereira, P.R., Schüler, M., Fuchs, B.M., Benneke, C., Teeling, H., Waldmann, J., *et al.*  
612 (2012) Genomic content of uncultured Bacteroidetes from contrasting oceanic provinces  
613 in the North Atlantic Ocean. *Environ Microbiol* **14**: 52-66.
- 614 Grossart, H.P. (1999) Interactions between marine bacteria and axenic diatoms  
615 (*Cylindrotheca fusiformis*, *Nitzschia laevis*, and *Thalassiosira weissflogii*) incubated under  
616 various conditions in the lab. *Aquat. Microb Ecol* **19**: 1-11.
- 617 Grossart, H.P., Hietanen, S., and Ploug, H. (2003) Microbial dynamics on diatom aggregates  
618 in Oresund, Denmark. *Mar Ecol Prog Ser* **249**: 69-78.
- 619 Grossart, H.P., Levold, F., Allgaier, M., Simon, M., and Brinkhoff, T. (2005) Marine diatom  
620 species harbour distinct bacterial communities. *Environ Microbiol* **7**: 860-873.
- 621 Grossart, H.P. (2010) Ecological consequences of bacterioplankton lifestyles: changes in  
622 concepts are needed. *Environ Microbiol Rep* **2**: 706-714.
- 623 Hall, E.K., Besemer, K., Kohl, L., Preiler, C., Riedel, K., Schneider, T., *et al.* (2012) Effects of  
624 resource chemistry on the composition and function of stream hyporheic Biofilms. *Front*  
625 *Microbiol* **3**: 1-14.
- 626 Hinzke, T., Kouris, A., Hughes, R.A., Strous, M., and Kleiner, M. (2019) More Is Not Always  
627 Better: Evaluation of 1D and 2D-LC-MS/MS Methods for Metaproteomics. *Front Microbiol*  
628 **10**: 238.
- 629 Houry, A., Briandet, R., Aymerich, S., and Gohar, M. (2010) Involvement of motility and  
630 flagella in *Bacillus cereus* biofilm formation. *Microbiology* **156**: 1009-1018.
- 631 Hyatt, D., Chen, G.L., LoCascio, P.F., Land, M.L., Larimer, F.W., and Hauser, L.J. (2010)  
632 Prodigal: prokaryotic gene recognition and translation initiation site identification. *BMC*  
633 *Bioinformatics* **11**: 119.
- 634 Kappelmann, L., Krüger, K., Hehemann, J.H., Harder, J., Markert, S., Unfried, F., *et al.*  
635 (2019) Polysaccharide utilization loci of North Sea *Flavobacteriia* as basis for using  
636 SusC/D-protein expression for predicting major phytoplankton glycans. *ISME J* **13**: 76-91
- 637 Keeling, P.J., Burki, F., Wilcox, H.M., Allam, B., Allen, E.E., Amaral-Zettler, L.A., *et al.* (2014)  
638 The Marine Microbial Eukaryote Transcriptome Sequencing Project (MMETSP):

639 Illuminating the functional diversity of eukaryotic life in the oceans through transcriptome  
640 sequencing. *PLoS Biol* **12**: e1001889-6.

641 Keiblinger, K.M., and Riedel, K. (2018) Sample Preparation for Metaproteome Analyses of  
642 Soil and Leaf Litter. *Methods Mol Biol* **1841**: 303-318.

643 Keller, A., Nesvizhskii, A.I., Kolker, E., and Aebersold, R. (2002) Empirical statistical model to  
644 estimate the accuracy of peptide identifications made by MS/MS and database search.  
645 *Anal Chem* **74**: 5383-5392.

646 Kroth, P.G., Chiovitti, A., Gruber, A., Martin-Jezequel, V., Mock, T., Schnitzler Parker, M., *et*  
647 *al.* (2008). A model for carbohydrate metabolism in the diatom *Phaeodactylum tricornutum*  
648 deduced from comparative whole genome analysis. *PLoS One* **3**: e1426.

649 Kuhn, R., Benndorf, D., Rapp, E., Reichl, U., Palese, L.L., and Pollice, A. (2011)  
650 Metaproteome analysis of sewage sludge from membrane bioreactors. *Proteomics* **11**:  
651 2738-2744.

652 Lassek, C., Burghartz, M., Chaves-Moreno, D., Otto, A., Hentschker, C., Fuchs, S., *et al.*  
653 (2015) A metaproteomics approach to elucidate host and pathogen protein expression  
654 during catheter-associated urinary tract infections (CAUTIs). *Mol Cell Proteomics* **14**: 989-  
655 1008.

656 Lemon, K.P., Higgins, D.E., and Kolter, R. (2007) Flagellar motility is critical for *Listeria*  
657 *monocytogenes* biofilm formation. *J Bacteriol* **189**: 1009-1018.

658 Li, D., Luo, R., Liu, C.M., Leung, C.M., Ting, H.F., Sadakane, K., *et al.* (2016) MEGAHIT  
659 v1.0: A Fast and Scalable Metagenome Assembler driven by Advanced Methodologies  
660 and Community Practices. *Methods* **102**: 3-11.

661 Mineta, K., and Gojobori, T. (2016). Databases of the marine metagenomics. *Gene* **576**: 724-  
662 728.

663 Moog, G. (2012) Optimierung der Probenaufbereitung für Metaproteomanalysen mittels  
664 Massenspektrometrie. Diploma thesis at the University of Greifswald, Institute of  
665 Microbiology.

- 666 Moore, E.K., Nunn, B.L., Goodlett, D.R., Harvey, H.R. (2012) Identifying and tracking  
667 proteins through the marine water column: insights into the inputs and preservation  
668 mechanisms of protein in sediments. *Geochim Cosmochim Acta* **83**: 324-359.
- 669 Morris, R.M., Nunn, B.L., Frazar, C., Goodlett, D.R., Ting, Y.S., and Rocap, G. (2010)  
670 Comparative metaproteomics reveals ocean-scale shifts in microbial nutrient utilization  
671 and energy transduction. *ISME J* **4**: 673-685.
- 672 Nesvizhskii, A.I., Keller, A., Kolker, E., and Aebersold, R. (2003) A statistical model for  
673 identifying proteins by tandem mass spectrometry. *Anal Chem* **75**: 4646-4658.
- 674 Nurk, S., Meleshko, D., Korobeynikov, A., and Pevzner, P.A. (2017) metaSPAdes: a new  
675 versatile metagenomic assembler. *Genome Res* **27**: 824-834.
- 676 O'Toole, G.A., and Kolter, R. (1998) Flagellar and twitching motility are necessary for  
677 *Pseudomonas aeruginosa* biofilm development. *Mol Microbiol* **30**: 295-304.
- 678 Perez-Riverol, Y., Csordas, A., Bai, J., Bernal-Llinares, M., Hewapathirana, S., Kundu, D.J.,  
679 *et al.* (2019) The PRIDE database and related tools and resources in 2019: improving  
680 support for quantification data. *Nucleic Acids Res* **47**: D442-D450.
- 681 Pinhassi, J., Sala, M.M., Havskum, H., Peters, F., Guadayol, O., Malits, A., *et al.* (2004)  
682 Changes in bacterioplankton composition under different phytoplankton regimens. *AEM*  
683 **70**: 6753-6766.
- 684 Raes, J., and Bork, P. (2008) Molecular eco-systems biology: towards an understanding of  
685 community function. *Nat Rev Microbiol* **6**: 693-699.
- 686 Ram, R.J., Verberkmoes, N.C., Thelen, M.P., Tyson, G.W., Baker, B.J., Blake, R.C., *et al.*  
687 (2005) Community proteomics of a natural microbial biofilm. *Science* **308**: 1915-1920.
- 688 Riemann, L., Steward, G.F., and Azam, F. (2000) Dynamics of bacterial community  
689 composition and activity during a mesocosm diatom bloom. *AEM* **66**: 578-587.
- 690 Saito, M.A., Bertrand, E.M., Duffy, M.E., Gaylord, D.A., Held, N.A., Hervey, W.J., *et al.*  
691 (2019) Progress and challenges in ocean metaproteomics and proposed best practices for  
692 data sharing. *J Proteome Res* **18**: 1461-1476.

- 693 Schneider, T., and Riedel, K. (2010) Environmental proteomics. Analysis of structure and  
694 function of microbial communities. *Proteomics* **10**: 785-798.
- 695 Schneider, T., Schmid, E., de Castro Junior, J.V., Cardinale, M., Eberl, L., Grube, M., *et al.*  
696 (2011) Structure and function of the symbiosis partners of the lung lichen (*Lobaria*  
697 *pulmonaria* L. Hoffm.) analyzed by metaproteomics. *Proteomics* **11**: 2752-2756.
- 698 Schneider, T., Keiblinger, K.M., Schmid, E., Sterflinger-Gleixner, K., Ellersdorfer, G.,  
699 Roschitzki, B., *et al.* (2012) Who is who in litter decomposition? Metaproteomics reveals  
700 major microbial players and their biogeochemical functions. *ISME J* **6**: 1749-1762.
- 701 Seemann, T. (2014) Prokka: rapid prokaryotic genome annotation. *Bioinformatics* **30**: 2068-  
702 2069.
- 703 Simon, M., Grossart, H.P., Schweitzer, B., and Ploug, H. (2002) Microbial ecology of organic  
704 aggregates in aquatic ecosystems. *Aquat Microb Ecol* **28**: 175-211.
- 705 Simon, M., Glöckner, F.O., and Amann, R. (1999) Different community structure and  
706 temperature optima of heterotrophic picoplankton in various regions of the Southern  
707 Ocean. *Aquat Microb Ecol* **18**: 275-284.
- 708 Sohn, J.H., Lee, J.H., Yi, H., Chun, J., Bae, T.S., Ahn, T.Y., *et al.* (2004) *Kordia algicida* gen.  
709 nov., sp. nov., an algicidal bacterium isolated from red tide. *Int J Syst Evol Microbiol* **54**:  
710 675-80.
- 711 Teeling, H., Fuchs, B.M., Becher, D., Klockow, C., Gardebrecht, A., Bennke, C.M., *et al.*  
712 (2012) Substrate-controlled succession of marine bacterioplankton populations induced by  
713 a phytoplankton bloom. *Science* **336**: 608-611.
- 714 Teeling, H., Fuchs, B.M., Bennke, C.M., Krüger, K., Chafee, M., Kappelmann, L., *et al.*  
715 (2016) Recurring patterns in bacterioplankton dynamics during coastal spring algae  
716 blooms. *Elife* **5**: e1188.
- 717 Thompson, M.R., Chourey, K., Froelich, J.M., Erickson, B.K., VerBerkmoes, N.C., and  
718 Hettich, R.L. (2008) Experimental approach for deep proteome measurements from small-  
719 scale microbial biomass samples. *Anal Chem* **80**: 9517-9525.

- 720 Volkman, J., and Tanoue, E. (2002) Chemical and biological studies of particulate organic  
721 matter in the ocean. *J Oceanogr* **58**: 265-279.
- 722 Wang, D.Z., Xie, Z.X., and Zhang, S.F. (2014). Marine metaproteomics: current status and  
723 future directions. *J Proteomics* **97**: 27-35.
- 724 Williams, T.J., Long, E., Evans, F., Demaere, M.Z., Lauro, F.M., Raftery, M.J., *et al.* (2012) A  
725 metaproteomic assessment of winter and summer bacterioplankton from Antarctic  
726 Peninsula coastal surface waters. *ISME J* **6**: 1883-1900.
- 727 Wilmes, P., Wexler, M., and Bond, P.L. (2008) Metaproteomics provides functional insight  
728 into activated sludge wastewater treatment. *PLoS One* **3**: e1778.
- 729 Wöhlbrand, L., Wemheuer, B., Feenders, C., Ruppertsberg, H.S., Hinrichs, C., Blasius, B., *et*  
730 *al.* (2017a) Complementary metaproteomic approaches to assess the bacterioplankton  
731 response toward a phytoplankton spring bloom in the Southern North Sea. *Front Microbiol*  
732 **8**: 442.
- 733 Wöhlbrand, L., Feenders, C., Nachbaur, J., Freund, H., Engelen, B., Wilkes, H., *et al.*  
734 (2017b) Impact of extraction methods on the detectable protein complement of  
735 metaproteomic analyses of marine sediments. *Proteomics* **17**: 22.
- 736 Zhou, J., Bruns, M.A., and Tiedje, J.M. (1995) DNA Recovery from Soils of Diverse  
737 Composition. *AEM* **62**: 316-322.

738 **Figure legends**

739 **Figure 1: (A) Sampling strategy and (B) evaluation of protein extraction and MS**  
740 **sample preparation protocols. (A)** Water samples collected at “Kabeltonne” Helgoland  
741 during the spring bloom 2009 were sequentially filtered to obtain the 0.2 - 3  $\mu\text{m}$  (FL) and two  
742 PA (3 - 10  $\mu\text{m}$  = medium,  $\geq 10 \mu\text{m}$  = large) fractions as described in Teeling *et al.* (2012).  
743 Filters were initially cut into three or four pieces, which were subsequently shredded and  
744 mixed with the respective extraction buffer. **(B)** Filters (medium particles = yellow; large  
745 particles = blue) from different sampling time points (turquoise, green and red) were  
746 processed according to the six different protocols describe in the experimental procedure  
747 section. With regard to the extracted protein amount the bead beating and SDS-acetone  
748 approaches obviously outcompeted the four other protocols. However, the SDS-acetone  
749 protocol was less reproducible than the bead beating protocol. Considering bead beating and  
750 SDS-acetone as best performing protocols, they were employed to test different MS sample  
751 preparation approaches, i.e., different number of SDS gel fractions for tryptic digestion  
752 together with protein reduction (red.) and alkylation (alk.) prior to tryptic digestion. The  
753 subsequent LC-MS/MS analyses revealed best results for the bead beating protocol followed  
754 by GeLC-MS/MS from 20 fractions without protein reduction and alkylation as shown in the  
755 bottom line of the figure. Bubble sizes for the large (blue) and medium (yellow) particles  
756 correspond to the number of identified protein groups (see also **Fig. S1**).

757

758 **Figure 2: Final metaproteomics pipeline.** Protein extraction from filters was conducted  
759 using 5% (w/v) SDS containing lysis buffer, cell disruption by FastPrep-mediated bead  
760 beating, separation of proteins by 1D-SDS-PAGE, tryptic in-gel digestion, LC-MS/MS  
761 analyses on an Orbitrap Velos<sup>TM</sup> mass spectrometer, MASCOT database search against the  
762 metagenome-based database (0.2 + 3  $\mu\text{m}$  2009) and data-processing and visualization with  
763 the *in-house*-developed bioinformatics tools *Prophane 3.1* and *Paver*.

764

765 **Figure 3: Taxonomic affiliation of proteins of FL and PA metaproteomes during the**  
766 **spring bloom on 14<sup>th</sup> of April 2009 at “Kabeltonne” Helgoland. (A)** Distribution of pro-  
767 and eukaryotes in the FL (0.2 - 3  $\mu\text{m}$ ) and PA (3 - 10  $\mu\text{m}$ ,  $\geq$  10  $\mu\text{m}$ ) fractions based on the  
768 relative abundance of protein groups assigned to the different phylogenetic groups. **(B)**  
769 Voronoi treemaps visualizing the phylogenetic assignment of bacterial protein groups  
770 identified in FL (red) and PA (yellow and blue) fractions. Cell size corresponds to the relative  
771 abundance of the respective bacterial genus on protein level. Proteins of *Reinekea* for  
772 example are most abundant in the FL fraction and are therefore encoded by a large red  
773 treemap cell. In the PA fractions they can be detected only in traces resulting in very small  
774 cell sizes (coloured in yellow and blue). *Algibacter* protein abundance, on the other hand,  
775 was notably higher in the PA fractions, compared to the FL fraction.

776

777 **Figure 4: Functional assignment of proteins in FL and PA metaproteomes during the**  
778 **spring bloom on 14<sup>th</sup> of April 2009 at “Kabeltonne” Helgoland. (A)** Total abundance of  
779 selected protein groups with assigned functions in the FL (0.2 – 3  $\mu\text{m}$  = small) and PA (3 - 10  
780  $\mu\text{m}$  = medium and  $\geq$  10  $\mu\text{m}$  = large) fractions. **(B)** Voronoi treemaps showing the  
781 phylogenetic assignment of selected functional protein groups identified in FL (red) and PA  
782 (yellow and blue) fractions. Cell size corresponds to the relative abundance of the respective  
783 genus within specific functional categories.

784

785 **Figure 5: Phylogenetic assignment of eukaryotic proteins present in the FL and PA**  
786 **fractions during the spring bloom on 14<sup>th</sup> of April 2009 at “Kabeltonne” Helgoland. (A)**  
787 Distribution of different eukaryotes in the FL (0.2  $\mu\text{m}$ ) and PA (0.2 - 3  $\mu\text{m}$  and  $\geq$  10  $\mu\text{m}$ )  
788 fractions as shown by the relative protein abundances assigned to the different eukaryotic  
789 phylogenetic groups. **(B)** Voronoi treemap visualizing the relative abundance of eukaryotic  
790 taxa based on the abundance of assigned proteins extracted from the FL (red) and PA  
791 (yellow and blue) fractions. Cell size corresponds to the relative abundance of the respective  
792 genus. In this preliminary analysis, protein identification is based on metagenomic (DNA-



793 based) information from the filtered fractions, which suffers limitations for eukaryotic protein  
794 identification, probably resulting in incomplete functional and taxonomic profiles.

795

796

797 **Supplemental Material**

798 **Figure S1. Protein identifications obtained by different extraction and protein pre-**  
799 **fractionation protocols.** For the medium particle size fraction (3 - 10  $\mu\text{m}$ , yellow), 20 gel  
800 fractions after standard treatment, i.e. without protein reduction (red.) and alkylation (alk.),  
801 resulted in the highest number of identified protein groups, no matter which protein extraction  
802 protocol (SDS-acetone (red) or bead beating (green)) was applied. For the large particle  
803 fraction ( $\geq 10 \mu\text{m}$ , blue) the general trend was similar. However, the beat beating protocol  
804 performed better compared to the SDS-acetone protocol.

805  
806 **Figure S2: Number of identified protein groups obtained with different databases: (I)**  
807 the non-redundant NCBI database (NCBInr, 136,216,794 entries), **(II)** a database with  
808 Uniprot sequences of known abundant bacteria and diatoms identified by the study of  
809 Teeling *et al.* (2012) (PABD, 2,638,314 entries), **(III)** a metagenome-based database  
810 employed for the FL bacterial fraction within the study of Teeling *et al.* (2012) (MIMAS,  
811 1,579,724 entries) and **(IV)** a database based on translated metagenomes of the FL fraction  
812 on the 0.2  $\mu\text{m}$  filters and particles on the 3  $\mu\text{m}$  filters sampled on the 14<sup>th</sup> of April 2009 (0.2 +  
813 3  $\mu\text{m}$  2009, 1,463,572 entries).

814

815 **Figure S3: Venn diagram of overlapping and fraction-specific protein sets.**

816

817 **Table S1:** Prophane output for proteins extracted from 0.2  $\mu\text{m}$  pore-sized filters

818 **Table S2:** Prophane output for proteins extracted from 3  $\mu\text{m}$  pore-sized filters

819 **Table S3:** Prophane output for proteins extracted from 10  $\mu\text{m}$  pore-sized filters

820 **Table S4:** Distribution of phylogenetic groups within proteins extracted from the 0.2  $\mu\text{m}$ , 3  
821  $\mu\text{m}$  and 10  $\mu\text{m}$  pore-sized filters.

**Table 1:** Comparison of the six tested protein extraction protocols

| Protocol Nr.                                             | 1 - Phenol                                | 2 - SDS-TCA                               | 3 - TRI-reagent®                                                    | 4 - Freeze and thaw                                                                               | 5 - SDS-acetone                                                                                    | 6 - Bead beating                                                                                |
|----------------------------------------------------------|-------------------------------------------|-------------------------------------------|---------------------------------------------------------------------|---------------------------------------------------------------------------------------------------|----------------------------------------------------------------------------------------------------|-------------------------------------------------------------------------------------------------|
| <b>Reference</b>                                         | Kuhn <i>et al.</i> (2011)                 | Schneider <i>et al.</i> (2012)            | Sigma Aldrich                                                       | Chourey <i>et al.</i> (2010)<br>Thompson <i>et al.</i> (2008)                                     | Hall <i>et al.</i> (2012)                                                                          | Moog (2012)                                                                                     |
| <b>Originally used for</b>                               | sewage sludge from biomembrane reactors   | leaf litter                               | simultaneous extraction of RNA, DNA, and proteins                   | soil                                                                                              | stream hyporheic biofilms                                                                          | hypersaline microbial mats                                                                      |
| <b>Composition of the protein extraction buffer</b>      | 0.1 M NaOH                                | 1% (w/v) SDS, 50 mM Tris/HCl, pH 7        | TRI-Reagent® (guanidine thiocyanate and phenol monophasic solution) | 5% (w/v) SDS, 50 mM Tris/HCl, 0.1 mM EDTA, 0.15 M NaCl, 1 mM MgCl <sub>2</sub> , 50mM DTT, pH 8.5 | 1% (w/v) SDS, 50 mM Tris/HCl, pH 6.8                                                               | 5% (w/v) SDS, 0.05 mM Tris/HCl, 0.1 M DTT, 0.01 M EDTA, 10% (v/v) glycerol, 1.7 mM PMSF, pH 6.8 |
| <b>Cell disruption methodology</b>                       | sonication<br>3 x 30 s (20% power output) | sonication<br>3 x 40 s (20% power output) | TRI-Reagent®                                                        | 2 freeze and thaw cycles (liquid nitrogen, rt), 10 min boiling                                    | sonication<br>5 x 1 min (20% power output),<br>15 min boiling,<br>procedure repeated on the pellet | FastPrep® 6.5 m/s,<br>4 x 30 s                                                                  |
| <b>Additional protein purification</b>                   | phenol extraction (2x)                    | /                                         | chloroform extraction,<br>ethanol extraction                        | /                                                                                                 | /                                                                                                  | /                                                                                               |
| <b>Protein precipitation</b>                             | 0.1 M ammonium-acetate in methanol (1:5)  | 10% TCA                                   | 2-propanol (1:1.5)                                                  | 25% TCA                                                                                           | acetone (1:5)                                                                                      | acetone (1:4)                                                                                   |
| <b>Mean total protein amount [µg] 3 - 10 µm fraction</b> | <b>8.9</b>                                | <b>22.7</b>                               | <b>16.1</b>                                                         | <b>25.2</b>                                                                                       | <b>38.6</b>                                                                                        | <b>27.3</b>                                                                                     |
| <b>Mean total protein amount [µg] ≥ 10 µm fraction</b>   | <b>8.8</b>                                | <b>12.8</b>                               | <b>38.2</b>                                                         | <b>24.3</b>                                                                                       | <b>102.1</b>                                                                                       | <b>114.2</b>                                                                                    |

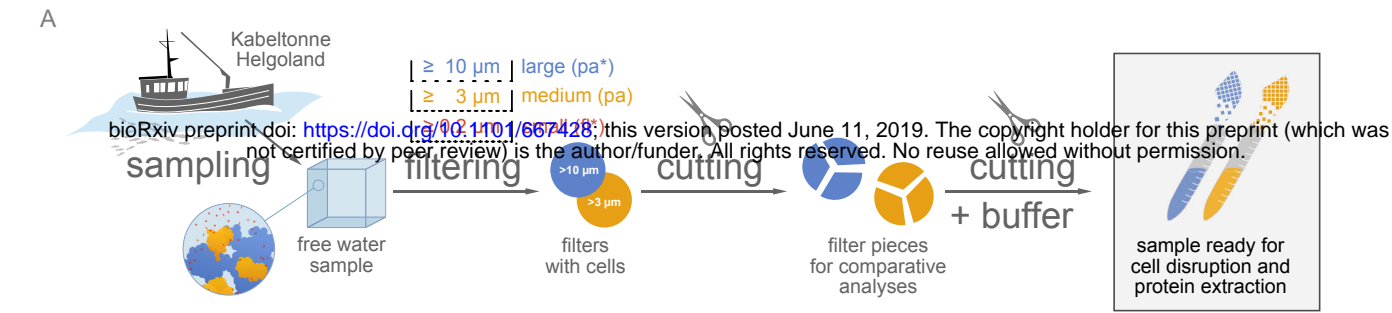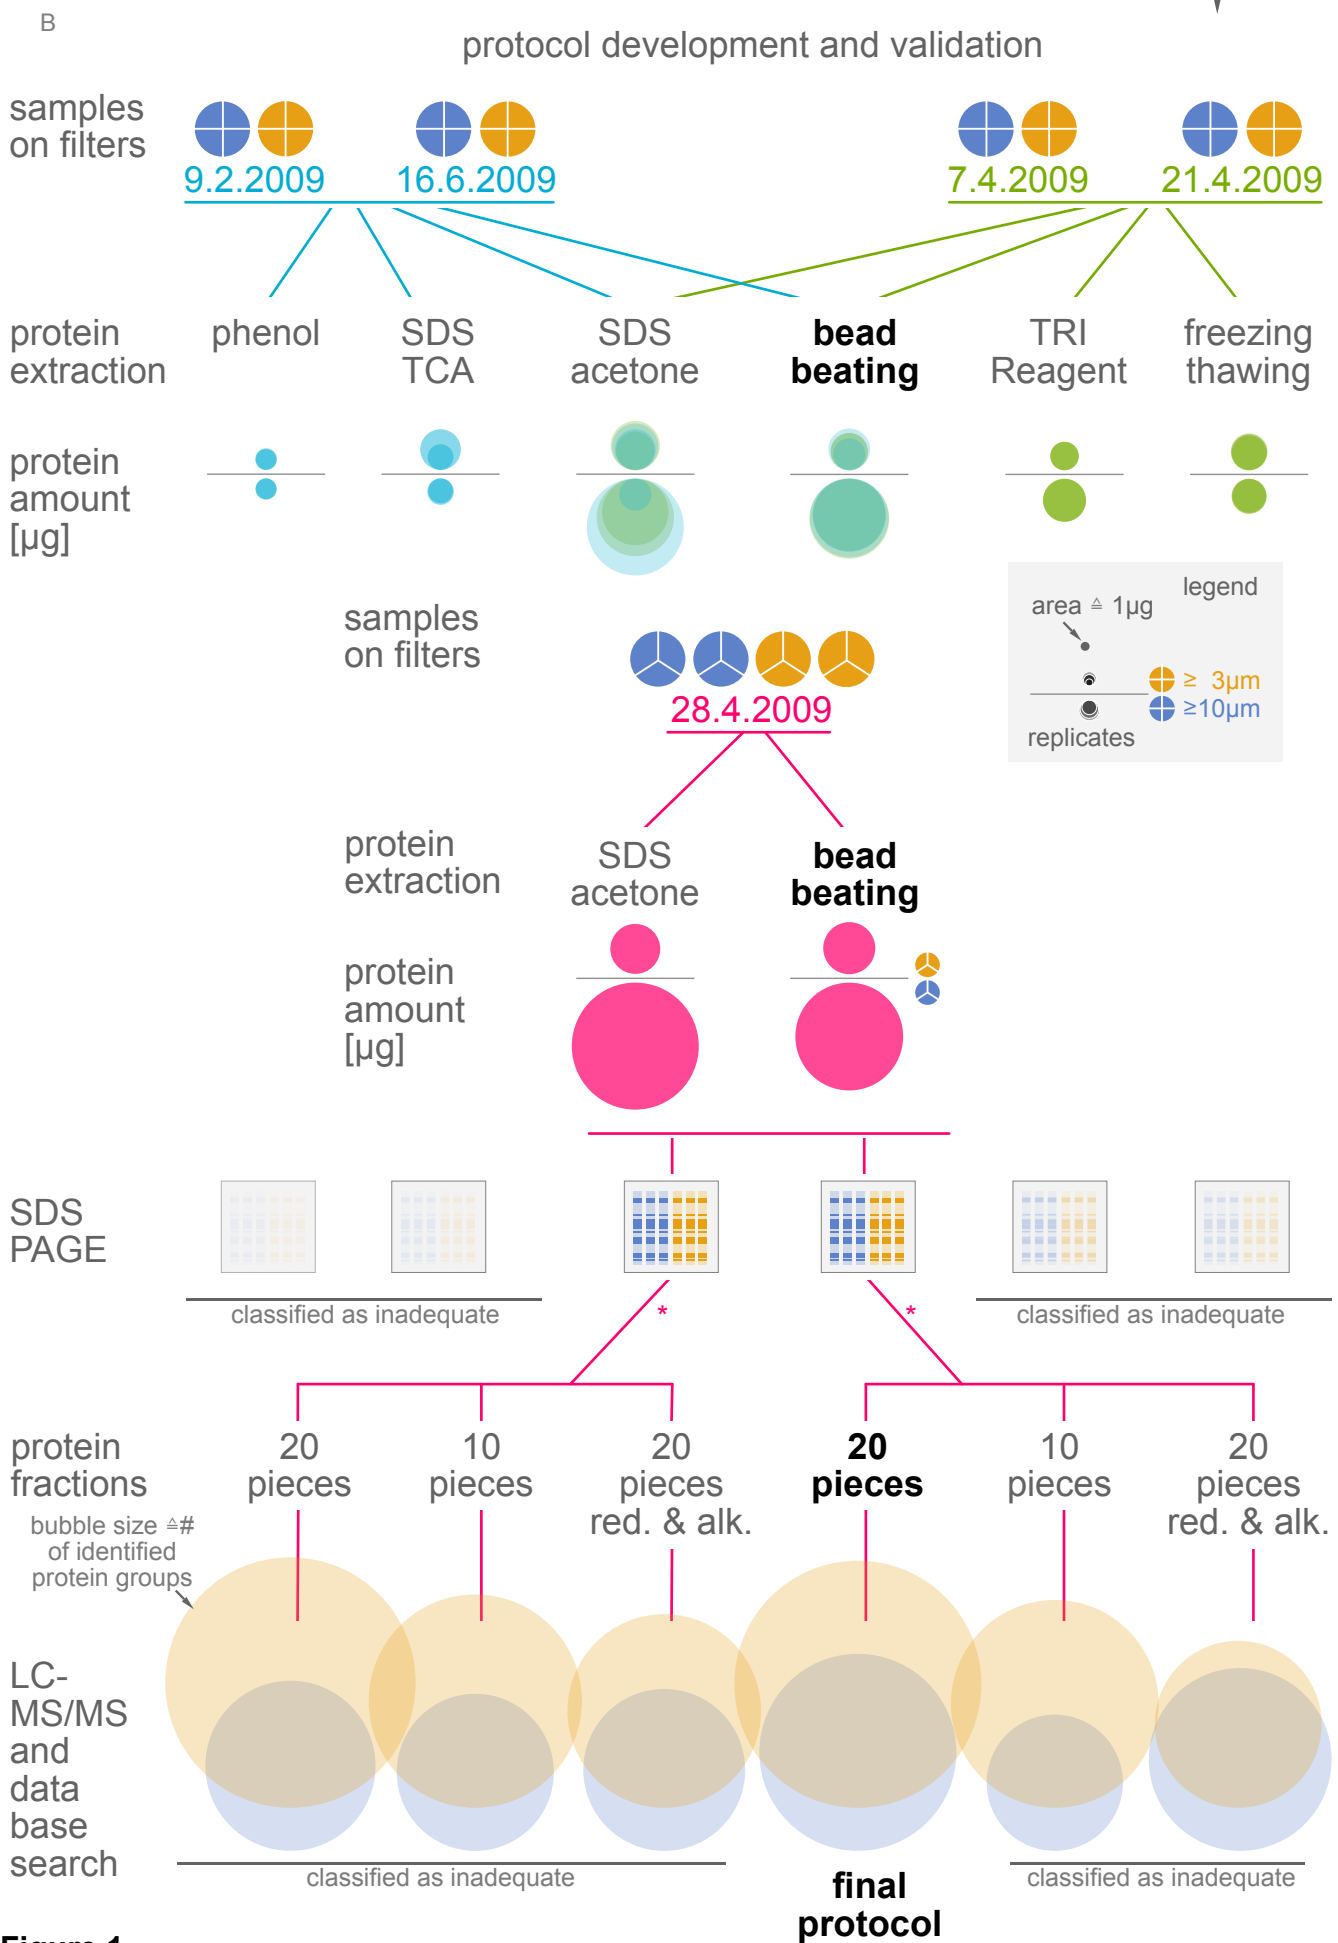

**Figure 1**

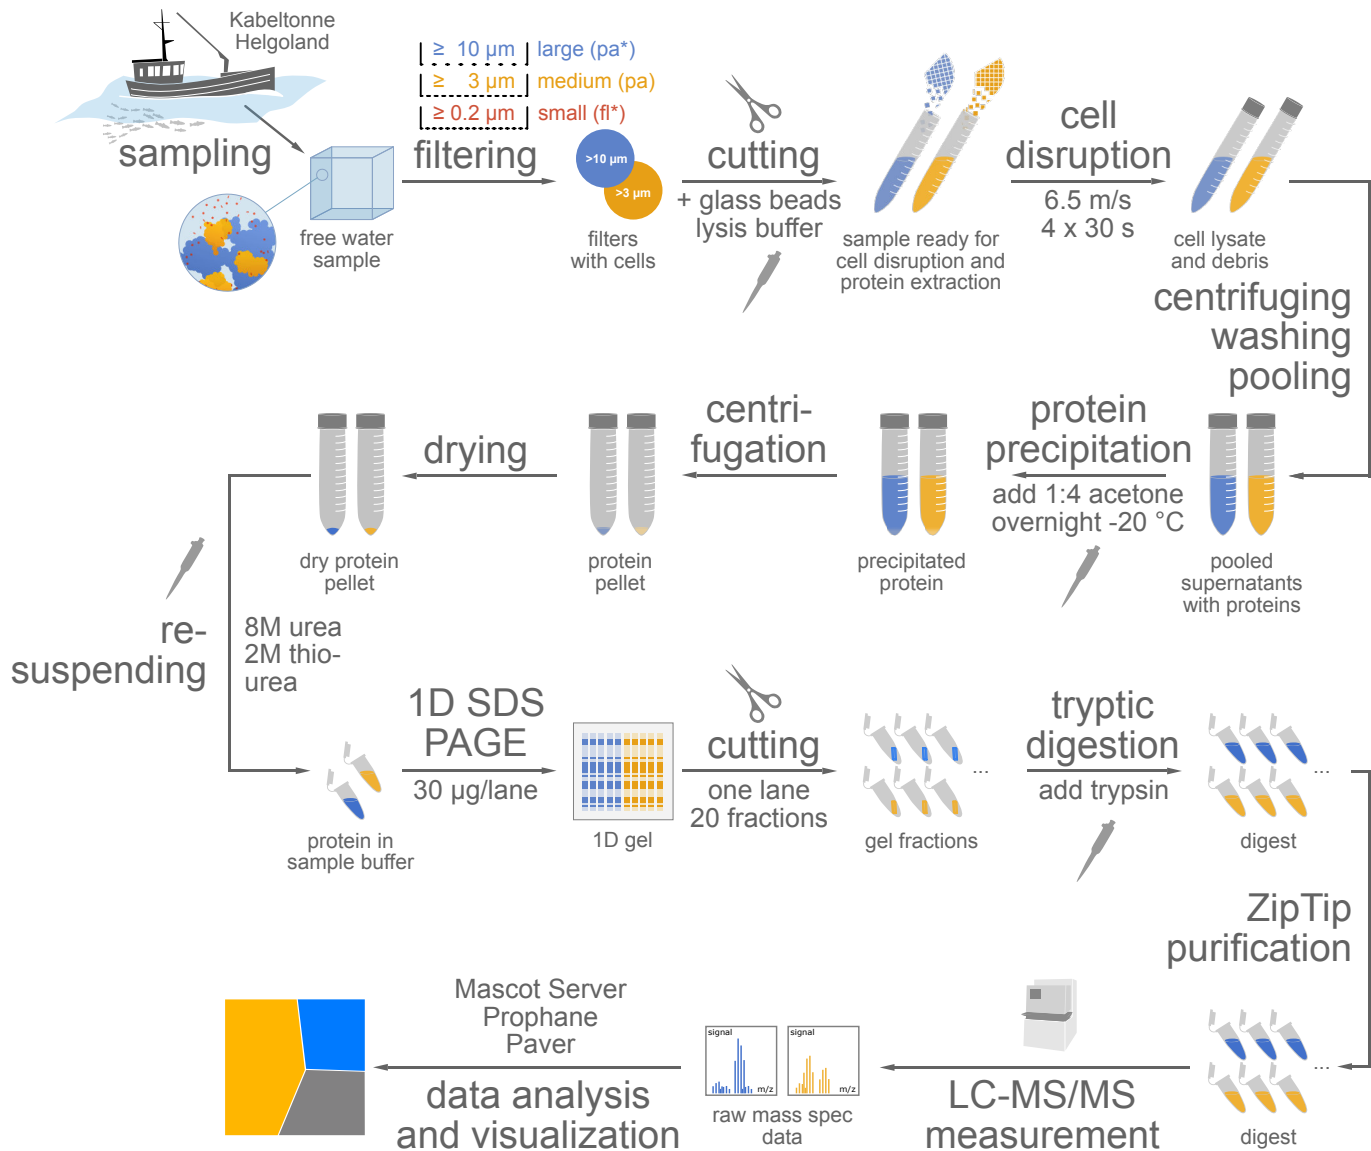

**Figure 2**

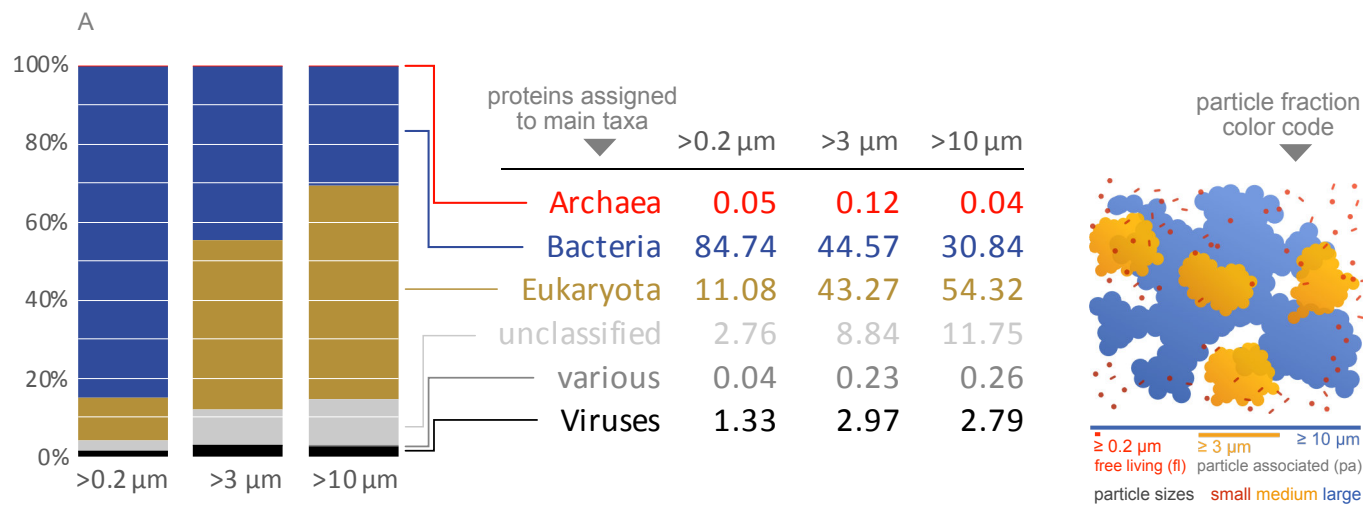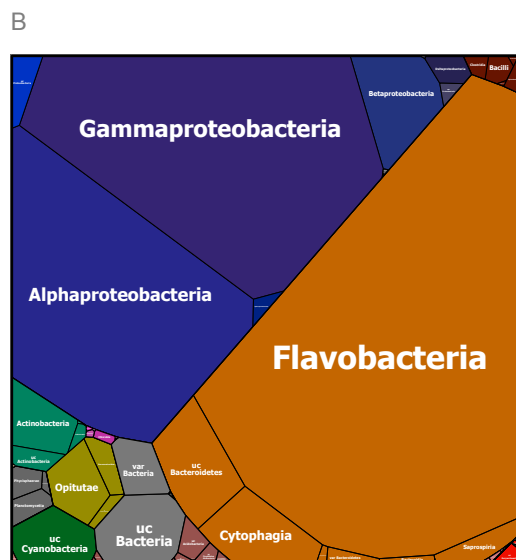

proteins assigned to bacterial genera which have been found in all respective fractions (colors)

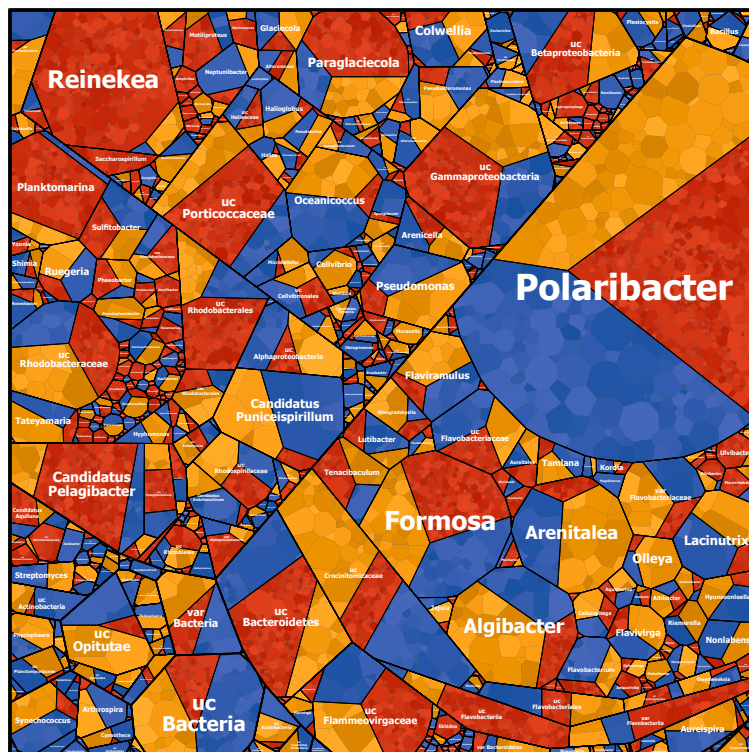

**Figure 3**

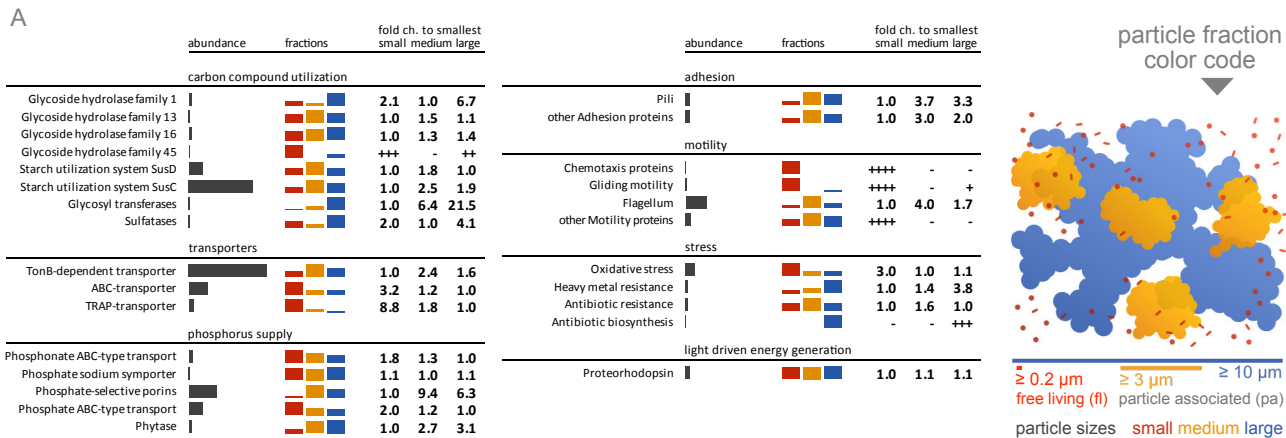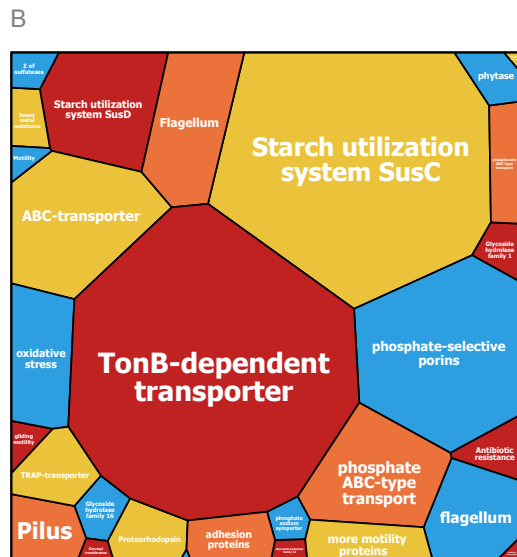

functional groups the given proteins were assigned to

proteins assigned to bacterial genera which have been found in all respective fractions (colors)

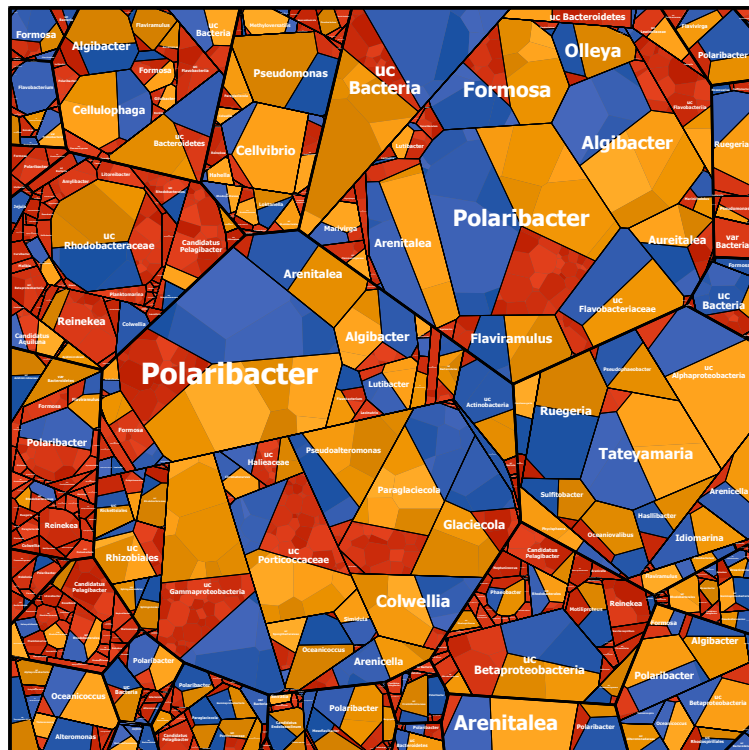

**Figure 4**

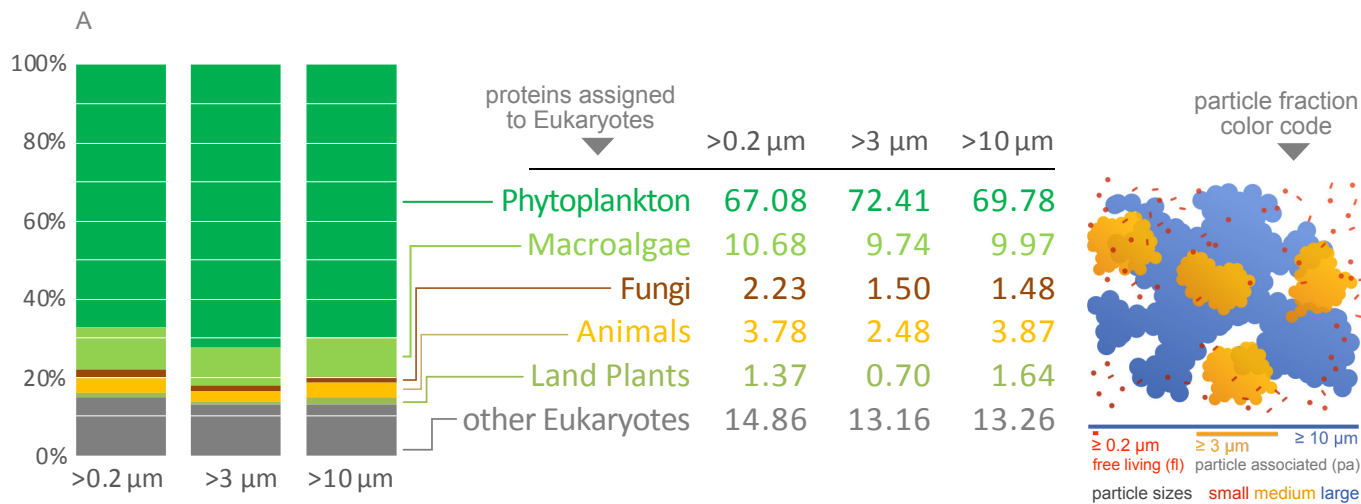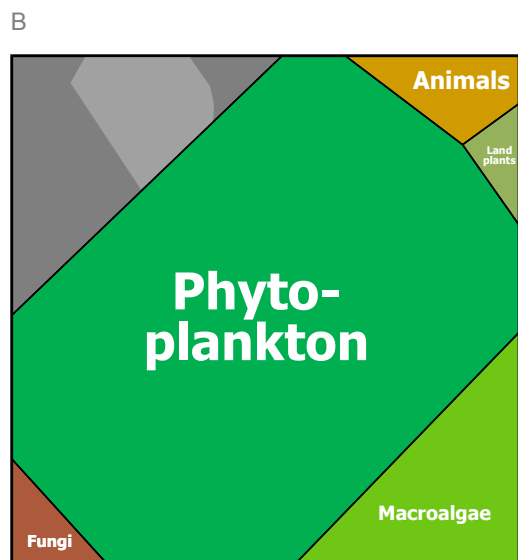

generic eukaryotic groups  
legend of hierarchical top level

protein assigned  
to orders of Eukaryotes which have been  
found in all respective fractions (colors)

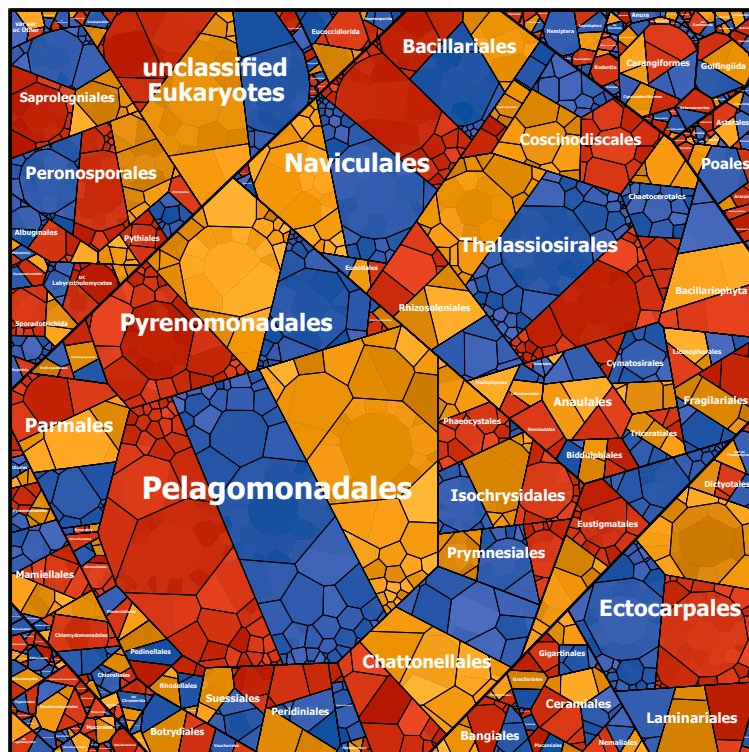

**Figure 5**
